# Supplementary material for: Admixture into and within sub-Saharan Africa
Source: eLife. 2016 Jun 21;5:e15266. doi: 10.7554/eLife.15266 (PMC4915815; doi:10.7554/eLife.15266)
Supplement: Figure 1—source data 1. — DOI: http://dx.doi.org/10.7554/eLife.15266.004 [file elife-15266-fig1-data1.xlsx]

## Sheet: Figure 1 - Source Data 1
Ancestry Region	Country	Ethnic Group	Origin	N (phased)	IBD	REL	n(final)
Western Africa Niger-Congo	Gambia	JOLA	this study	147	0	31	116
Western Africa Niger-Congo	Gambia	MANJAGO	this study	47	0	0	47
Western Africa Niger-Congo	Gambia	SEREHULE	this study	47	0	0	47
Western Africa Niger-Congo	Gambia	SERERE	this study	50	0	0	50
Western Africa Niger-Congo	Gambia	WOLLOF	this study	135	0	27	108
Western Africa Niger-Congo	Gambia	MANDINKAI	this study	60	0	28	32
Western Africa Niger-Congo	Gambia	MANDINKAII	this study	71	0	0	71
Western Africa Niger-Congo	Gambia	FULAI	this study	97	0	25	72
Western Africa Niger-Congo	Gambia	FULAII	this study	79	0	0	79
Western Africa Niger-Congo	Mali	BAMBARA	this study	50	0	0	50
Western Africa Niger-Congo	Mali	MALINKE	this study	49	0	0	49
Central West Africa Niger-Congo	BurkinaFaso	MOSSI	this study	50	0	0	50
Central West Africa Niger-Congo	Ghana	AKANS	this study	50	0	0	50
Central West Africa Niger-Congo	Ghana	KASEM	this study	50	0	0	50
Central West Africa Niger-Congo	Ghana	NAMKAM	this study	50	0	0	50
Central West Africa Niger-Congo	Nigeria	YORUBA	1KG	161	0	60	101
East Africa Niger-Congo	Cameroon	BANTU	this study	50	0	0	50
East Africa Niger-Congo	Cameroon	SEMI-BANTU	this study	50	0	0	50
East Africa Niger-Congo	Kenya	LUHYA	1KG	100	9	0	91
East Africa Niger-Congo	Kenya	CHONYI	this study	47	0	0	47
East Africa Niger-Congo	Kenya	KAUMA	this study	97	0	0	97
East Africa Niger-Congo	Kenya	KAMBE	this study	42	0	0	42
East Africa Niger-Congo	Kenya	GIRIAMA	this study	46	0	0	46
East Africa Niger-Congo	Tanzania	MZIGUA	this study	50	0	0	50
East Africa Niger-Congo	Tanzania	WABONDEI	this study	48	0	0	48
East Africa Niger-Congo	Tanzania	WASAMBAA	this study	50	0	0	50
East Africa Nilo-Saharan	Kenya	MAASAI	1KG	31	0	0	31
East Africa Nilo-Saharan	Sudan	SUDANESE	Pagani 2012	24	0	0	24
East Africa Nilo-Saharan	Ethiopia	GUMUZ	Pagani 2012	19	0	0	19
East Africa Nilo-Saharan	Ethiopia	ANUAK	Pagani 2012	23	0	0	23
East Africa Nilo-Saharan	Somalia	SOMALI	Pagani 2012	40	0	0	40
East Africa Afroasiatic	Ethiopia	ARI	Pagani 2012	41	0	0	41
East Africa Afroasiatic	Ethiopia	AFAR	Pagani 2012	12	0	0	12
East Africa Afroasiatic	Ethiopia	TIGRAY	Pagani 2012	21	0	0	21
East Africa Afroasiatic	Ethiopia	AMHARA	Pagani 2012	26	0	0	26
East Africa Afroasiatic	Ethiopia	WOLAYTA	Pagani 2012	8	0	0	8
East Africa Afroasiatic	Ethiopia	OROMO	Pagani 2012	21	0	0	21
South Africa Niger-Congo	Malawi	MALAWI	this study	100	0	0	100
South Africa Niger-Congo	Namibia	HERERO	Schlebusch 2012	12	0	0	12
South Africa Niger-Congo	SouthAfrica	SEBANTU	Schlebusch 2012	20	0	0	20
South Africa Niger-Congo	SouthAfrica	AMAXHOSA	Peterson 2013	15	0	0	15
South Africa KhoeSan	SouthAfrica	KARRETJIE	Schlebusch 2012	20	0	0	20
South Africa KhoeSan	SouthAfrica	KHOMANI	Schlebusch 2012	39	0	0	39
South Africa KhoeSan	Namibia	NAMA	Schlebusch 2012	20	0	0	20
South Africa KhoeSan	Namibia	KHWE	Schlebusch 2012	17	0	0	17
South Africa KhoeSan	Angola	!XUN	Schlebusch 2012 Peterson 2013	33	0	0	33
South Africa KhoeSan	Botswana	/GUI //GANA	Schlebusch 2012	15	0	0	15
South Africa KhoeSan	Namibia	JU/'HOANSI	Schlebusch 2012 Peterson 2013	37	0	0	37
Europe	Finland	FIN	1KG	100	0	0	100
Europe	NorthEurope	CEU	1KG	104	0	2	102
Europe	Britain	GBR	1KG	101	1	3	97
Europe	Spain	IBS	1KG	150	0	50	100
Europe	Italy	TSI	1KG	100	1	0	99
Asia	India	GIH	1KG	100	2	0	98
Asia	Vietnam	KHV	1KG	121	1	21	99
Asia	China	CDX	1KG	100	8	0	92
Asia	China	CHB	1KG	101	0	1	100
Asia	China	CHS	1KG	150	7	50	93
Asia	Japan	JPT	1KG	100	0	0	100
Americas	Peru	PELII	1KG	105*	0	0	16
*89 admixed Peruvians and 517 individuals from five other 1KG American populations were removed from further analysis after phasing
