# Supplementary material for: Admixture into and within sub-Saharan Africa
Source: eLife. 2016 Jun 21;5:e15266. doi: 10.7554/eLife.15266 (PMC4915815; doi:10.7554/eLife.15266)
Supplement: Figure 2—source data 1. — TVD has been multiplied by 1000. DOI: http://dx.doi.org/10.7554/eLife.15266.009 [file elife-15266-fig2-data1.xlsx]

## Sheet: Figure 2 - Source Data 1
Fst	JOLA	WOLLOF	MANDINKAI	MANDINKAII	SEREHULE	FULAI	MALINKE	SERERE	MANJAGO	FULAII	BAMBARA	AKANS	MOSSI	YORUBA	KASEM	NAMKAM	SEMI-BANTU	BANTU	LUHYA	KAMBE	CHONYI	KAUMA	WASAMBAA	GIRIAMA	WABONDEI	MZIGUA	MAASAI	WOLAYTA	SOMALI	ARI	SUDANESE	GUMUZ	OROMO	AMHARA	AFAR	ANUAK	TIGRAY	MALAWI	SEBANTU	AMAXHOSA	HERERO	KHWE	/GUI//GANA	KARRETJIE	NAMA	!XUN	KHOMANI	JU/'HOANSI
JOLA		4	1	3	5	23	6	3	3	5	7	10	9	10	10	9	11	13	15	15	19	17	15	17	14	14	32	52	58	54	30	46	57	66	69	30	68	15	19	20	21	29	58	66	51	68	59	106
WOLLOF	0.1		2	1	2	17	3	1	3	2	4	7	6	7	6	6	8	10	12	12	15	13	12	14	11	11	27	46	51	48	26	41	50	59	61	26	60	12	16	17	18	27	56	63	48	66	56	104
MANDINKAI	0.1	0.1		1	2	18	3	1	2	2	4	7	6	7	7	6	8	10	12	12	15	13	12	14	11	11	28	48	53	50	27	42	52	61	64	26	63	12	16	17	18	26	56	62	48	65	56	104
MANDINKAII	0	0	0.1		1	18	2	1	1	1	3	5	4	6	5	5	7	8	11	11	14	12	11	13	10	10	27	47	52	48	26	41	51	60	63	25	62	11	15	16	17	25	55	61	47	64	55	102
SEREHULE	0.1	0	0.1	0.1		17	1	2	3	1	2	5	4	6	5	5	7	8	11	10	14	12	10	12	10	10	26	45	51	48	25	40	50	59	61	25	60	11	15	16	17	25	55	61	47	65	55	103
FULAI	0.2	0.2	0.2	0.2	0.2		19	18	20	17	20	23	22	24	23	23	24	25	24	23	27	25	22	26	23	24	23	32	35	42	36	45	32	38	41	35	38	27	31	31	29	38	69	68	50	77	56	114
MALINKE	0.1	0.1	0.1	0.1	0.1	0.2		2	4	1	1	3	2	4	3	3	5	7	10	9	13	11	9	11	9	8	27	47	53	49	25	41	52	61	64	25	63	9	13	14	16	24	54	61	47	64	55	102
SERERE	0.1	0	0.1	0	0.1	0.2	0.1		2	1	3	6	5	6	6	5	8	9	12	11	15	13	11	13	11	10	28	47	53	49	26	41	52	61	63	26	62	11	15	16	17	26	56	62	47	65	56	104
MANJAGO	0.1	0.1	0.1	0.1	0.1	0.2	0.1	0.1		2	4	7	6	7	7	7	8	10	12	12	16	14	12	14	11	11	29	48	54	50	27	42	53	62	64	27	64	12	16	17	18	26	55	62	48	65	56	103
FULAII	0.1	0	0.1	0	0	0.2	0	0	0.1		1	3	3	4	3	3	5	6	9	9	12	10	9	11	8	8	26	45	52	47	25	40	50	59	62	24	61	9	13	14	15	23	52	59	44	62	53	100
BAMBARA	0.1	0.1	0.1	0.1	0.1	0.2	0.1	0.1	0.1	0		2	2	3	2	2	4	6	9	9	12	10	9	10	8	8	27	48	53	49	25	41	52	62	64	24	63	8	13	13	15	24	54	61	47	64	55	102
AKANS	0.1	0.1	0.1	0.1	0.1	0.3	0.1	0.1	0.1	0.1	0.1		2	2	2	2	4	5	9	8	12	10	8	10	8	7	29	50	56	50	26	42	55	64	67	25	66	7	12	13	14	23	52	60	46	62	55	101
MOSSI	0.1	0.1	0.1	0.1	0.1	0.2	0.1	0.1	0.1	0.1	0.1	0.1		2	1	1	4	5	9	9	12	10	8	10	8	7	28	49	54	50	25	41	53	62	65	25	64	8	13	13	14	24	55	62	48	65	56	104
YORUBA	0.1	0.1	0.1	0.1	0.1	0.2	0.1	0.1	0.1	0.1	0.1	0	0.1		2	2	2	4	8	7	10	9	7	9	6	6	28	49	55	50	25	41	54	64	66	25	65	6	11	12	13	22	53	61	46	63	55	102
KASEM	0.1	0.1	0.1	0.1	0.1	0.3	0.1	0.1	0.1	0.1	0.1	0.1	0.1	0.1		0	4	6	9	9	12	10	9	10	8	8	28	49	55	51	26	42	54	63	66	25	65	8	13	14	15	24	55	63	48	65	57	104
NAMKAM	0.1	0.1	0.1	0.1	0.1	0.3	0.1	0.1	0.1	0.1	0.1	0.1	0.1	0.1	0.1		4	5	9	9	12	10	9	10	8	8	28	49	55	50	25	41	54	63	66	25	65	8	13	14	15	24	55	63	48	65	57	104
SEMI-BANTU	0.1	0.1	0.1	0.1	0.1	0.3	0.1	0.1	0.1	0.1	0.1	0.1	0.1	0.1	0.1	0.1		2	6	5	8	6	5	7	4	4	26	48	54	48	24	39	53	62	65	23	64	4	8	9	11	19	49	57	43	59	51	97
BANTU	0.1	0.1	0.1	0.1	0.1	0.3	0.1	0.1	0.2	0.1	0.1	0.1	0.1	0.1	0.1	0.1	0.1		6	5	8	7	6	7	5	4	27	48	55	48	24	40	53	63	66	24	65	4	8	9	11	19	48	56	42	58	51	96
LUHYA	0.1	0.1	0.1	0.1	0.1	0.2	0.1	0.1	0.1	0.1	0.1	0.1	0.1	0.1	0.1	0.1	0.1	0.1		5	8	6	4	7	4	4	18	38	45	40	17	31	43	52	55	16	54	6	10	10	13	20	48	54	40	58	48	95
KAMBE	0.1	0.1	0.1	0.1	0.1	0.2	0.1	0.1	0.1	0.1	0.1	0.1	0.1	0.1	0.1	0.1	0.1	0.1	0.1		3	1	2	1	2	2	20	39	45	41	23	36	43	52	55	22	54	3	7	8	12	19	47	53	39	57	46	94
CHONYI	0.2	0.2	0.2	0.1	0.2	0.2	0.1	0.2	0.2	0.1	0.1	0.1	0.1	0.1	0.1	0.1	0.1	0.1	0.1	0.1		5	5	6	5	5	25	44	51	46	27	40	49	58	61	26	60	6	10	11	15	22	50	56	43	60	50	98
KAUMA	0.1	0.1	0.1	0.1	0.1	0.2	0.1	0.1	0.1	0.1	0.1	0.1	0.1	0.1	0.1	0.1	0.1	0.1	0.1	0.1	0.1		4	3	3	3	23	41	48	43	24	38	46	55	58	24	57	4	8	9	13	20	48	55	41	59	48	96
WASAMBAA	0.1	0.1	0.1	0.1	0.1	0.2	0.1	0.1	0.1	0.1	0.1	0.1	0.1	0.1	0.1	0.1	0.1	0.1	0.1	0.1	0.1	0.1		4	1	1	19	37	43	39	22	34	41	50	53	21	52	3	7	8	12	18	45	51	37	55	44	92
GIRIAMA	0.1	0.1	0.2	0.1	0.1	0.3	0.1	0.1	0.2	0.1	0.1	0.1	0.1	0.1	0.1	0.1	0.1	0.1	0.1	0.1	0.1	0.1	0.1		4	4	23	43	49	45	25	38	47	56	59	24	58	5	9	10	14	21	49	55	42	59	49	97
WABONDEI	0.1	0.1	0.1	0.1	0.1	0.2	0.1	0.1	0.1	0.1	0.1	0.1	0.1	0.1	0.1	0.1	0.1	0.1	0.1	0.1	0.1	0.1	0.1	0.1		1	20	39	46	41	22	35	44	53	56	21	55	2	6	7	11	18	45	52	38	55	45	92
MZIGUA	0.1	0.1	0.1	0.1	0.1	0.2	0.1	0.1	0.1	0.1	0.1	0.1	0.1	0.1	0.1	0.1	0.1	0.1	0.1	0.1	0.1	0.1	0.1	0.1	0.1		22	42	48	43	23	37	46	56	58	22	57	2	6	7	11	18	46	53	39	57	47	94
MAASAI	0.3	0.3	0.3	0.3	0.3	0.2	0.3	0.3	0.3	0.3	0.3	0.3	0.3	0.3	0.3	0.3	0.3	0.3	0.2	0.2	0.3	0.2	0.2	0.2	0.2	0.2		13	17	23	18	25	14	21	23	16	22	28	29	29	28	34	62	59	40	69	46	104
WOLAYTA	0.5	0.5	0.5	0.5	0.5	0.4	0.5	0.5	0.5	0.5	0.5	0.5	0.5	0.5	0.5	0.5	0.5	0.5	0.5	0.4	0.5	0.4	0.4	0.5	0.4	0.5	0.3		11	15	38	34	3	7	12	35	8	49	49	48	45	50	77	69	48	82	52	115
SOMALI	0.5	0.4	0.5	0.4	0.4	0.3	0.4	0.4	0.5	0.4	0.4	0.5	0.5	0.5	0.5	0.5	0.4	0.5	0.4	0.4	0.4	0.4	0.4	0.4	0.4	0.4	0.2	0.3		31	42	45	7	9	10	41	9	56	57	56	52	60	89	80	59	95	62	130
ARI	0.3	0.3	0.3	0.3	0.3	0.3	0.3	0.3	0.3	0.3	0.3	0.3	0.3	0.3	0.3	0.3	0.3	0.3	0.3	0.3	0.3	0.3	0.3	0.3	0.3	0.3	0.2	0.3	0.3		38	32	22	31	36	35	33	49	48	48	48	49	73	68	50	78	55	110
SUDANESE	0.3	0.2	0.3	0.2	0.2	0.3	0.2	0.2	0.2	0.2	0.2	0.2	0.2	0.2	0.2	0.2	0.2	0.2	0.2	0.2	0.2	0.2	0.2	0.2	0.2	0.2	0.2	0.5	0.4	0.3		22	42	52	54	2	54	26	29	29	30	36	65	69	52	73	60	110
GUMUZ	0.4	0.3	0.4	0.3	0.3	0.4	0.3	0.4	0.4	0.3	0.3	0.3	0.3	0.3	0.4	0.3	0.3	0.3	0.3	0.3	0.3	0.3	0.3	0.3	0.3	0.3	0.3	0.5	0.4	0.3	0.3		41	51	55	19	53	41	42	42	43	47	73	75	57	80	64	115
OROMO	0.5	0.4	0.5	0.4	0.4	0.3	0.5	0.5	0.5	0.4	0.4	0.5	0.5	0.5	0.5	0.5	0.5	0.5	0.4	0.4	0.4	0.4	0.4	0.4	0.4	0.4	0.2	0.3	0.1	0.3	0.5	0.5		2	6	40	2	54	54	54	49	56	85	75	53	90	56	124
AMHARA	0.5	0.5	0.5	0.5	0.5	0.4	0.5	0.5	0.5	0.5	0.5	0.5	0.5	0.5	0.5	0.5	0.5	0.5	0.5	0.5	0.5	0.5	0.5	0.5	0.5	0.5	0.3	0.3	0.2	0.3	0.5	0.5	0.1		6	50	1	64	64	64	58	66	96	84	61	101	64	135
AFAR	0.6	0.6	0.6	0.6	0.6	0.4	0.6	0.6	0.6	0.6	0.6	0.6	0.6	0.6	0.6	0.6	0.6	0.6	0.6	0.6	0.6	0.6	0.6	0.6	0.6	0.6	0.4	0.4	0.2	0.4	0.6	0.6	0.2	0.2		53	5	67	67	67	61	70		88	65	105	68	139
ANUAK	0.2	0.2	0.2	0.2	0.2	0.3	0.2	0.2	0.2	0.2	0.2	0.2	0.2	0.2	0.2	0.2	0.2	0.2	0.2	0.2	0.2	0.2	0.2	0.2	0.2	0.2	0.2	0.5	0.5	0.3	0.1	0.3	0.5	0.5	0.6		52	25	28	28	30	35	63	67	50	71	59	108
TIGRAY	0.6	0.5	0.6	0.5	0.5	0.4	0.6	0.5	0.5	0.5	0.5	0.6	0.6	0.5	0.5	0.6	0.6	0.5	0.5	0.5	0.5	0.5	0.5	0.5	0.5	0.5	0.3	0.3	0.2	0.3	0.6	0.5	0.2	0.1	0.2	0.6		66	66	66	60	68	98	85	63	103	66	137
MALAWI	0.1	0.1	0.1	0.1	0.1	0.2	0.1	0.1	0.1	0.1	0.1	0.1	0.1	0.1	0.1	0.1	0.1	0.1	0.1	0.1	0.1	0.1	0.1	0.1	0.1	0.1	0.3	0.5	0.4	0.3	0.2	0.3	0.5	0.5	0.6	0.2	0.6		5	6	12	19	46	55	42	57	50	95
SEBANTU	0.2	0.2	0.2	0.2	0.2	0.3	0.2	0.2	0.2	0.2	0.2	0.2	0.2	0.2	0.2	0.2	0.1	0.2	0.1	0.1	0.2	0.1	0.1	0.2	0.1	0.1	0.3	0.5	0.5	0.4	0.3	0.4	0.5	0.6	0.7	0.3	0.6	0.1		1	14	13	30	36	28	41	34	74
AMAXHOSA	0.2	0.2	0.2	0.2	0.2	0.3	0.2	0.2	0.2	0.2	0.2	0.2	0.2	0.2	0.2	0.2	0.2	0.2	0.2	0.2	0.2	0.2	0.2	0.2	0.2	0.2	0.3	0.5	0.5	0.4	0.3	0.4	0.5	0.6	0.7	0.3	0.6	0.2	0.2		15	13	30	35	26	40	33	73
HERERO	0.3	0.3	0.3	0.3	0.3	0.4	0.3	0.3	0.3	0.3	0.3	0.3	0.2	0.2	0.3	0.3	0.2	0.2	0.2	0.2	0.3	0.2	0.2	0.2	0.2	0.2	0.4	0.6	0.6	0.4	0.4	0.4	0.6	0.6	0.7	0.4	0.6	0.2	0.3	0.3		21	48	53	36	56	46	92
KHWE	0.3	0.3	0.3	0.3	0.3	0.4	0.3	0.3	0.3	0.3	0.3	0.3	0.3	0.3	0.3	0.3	0.3	0.3	0.3	0.3	0.3	0.3	0.2	0.3	0.3	0.3	0.3	0.6	0.5	0.4	0.4	0.4	0.5	0.6	0.7	0.4	0.6	0.3	0.2	0.3	0.4		24	29	20	26	25	54
/GUI//GANA	0.5	0.5	0.5	0.5	0.5	0.6	0.5	0.5	0.5	0.5	0.5	0.5	0.5	0.5	0.5	0.5	0.5	0.5	0.5	0.5	0.5	0.5	0.5	0.5	0.5	0.5	0.6	0.8	0.7	0.6	0.6	0.6	0.7	0.8	0.8	0.6	0.8	0.5	0.5	0.5	0.6	0.4		17	18	18	18	32
KARRETJIE	0.5	0.5	0.5	0.5	0.5	0.6	0.5	0.5	0.5	0.5	0.5	0.5	0.5	0.5	0.5	0.5	0.5	0.5	0.5	0.5	0.5	0.5	0.5	0.5	0.5	0.5	0.6	0.7	0.7	0.6	0.6	0.6	0.7	0.8	0.8	0.6	0.8	0.5	0.5	0.5	0.6	0.4	0.3		8	18	6	30
NAMA	0.4	0.4	0.4	0.4	0.4	0.4	0.4	0.4	0.4	0.4	0.4	0.4	0.4	0.4	0.4	0.4	0.4	0.3	0.3	0.3	0.4	0.3	0.3	0.3	0.3	0.4	0.4	0.6	0.5	0.4	0.4	0.5	0.5	0.6	0.7	0.4	0.6	0.3	0.3	0.4	0.4	0.3	0.3	0.3		19	3	36
!XUN	0.5	0.5	0.5	0.5	0.5	0.6	0.5	0.5	0.5	0.5	0.5	0.5	0.5	0.5	0.5	0.5	0.5	0.5	0.5	0.5	0.5	0.5	0.5	0.5	0.5	0.5	0.5	0.7	0.6	0.5	0.5	0.6	0.6	0.7	0.8	0.6	0.7	0.5	0.5	0.5	0.6	0.4	0.3	0.2	0.3		19	15
KHOMANI	0.4	0.4	0.4	0.4	0.4	0.4	0.4	0.4	0.4	0.4	0.4	0.4	0.4	0.4	0.4	0.4	0.4	0.4	0.4	0.4	0.4	0.3	0.4	0.4	0.4	0.4	0.4	0.6	0.5	0.4	0.4	0.5	0.5	0.6	0.7	0.4	0.6	0.4	0.3	0.4	0.5	0.3	0.3	0.2	0.1	0.2		33
JU/'HOANSI	0.7	0.7	0.7	0.7	0.7	0.7	0.7	0.7	0.7	0.7	0.7	0.7	0.7	0.6	0.7	0.7	0.6	0.6	0.6	0.6	0.6	0.6	0.6	0.6	0.6	0.6	0.7	0.8	0.8	0.7	0.7	0.8	0.8	0.9	0.9	0.7	0.9	0.6	0.6	0.6	0.7	0.5	0.4	0.3	0.4	0.2	0.3
FIN	1.1	1	1.1	1.1	1	0.9	1.1	1.1	1.1	1	1.1	1.1	1.1	1.1	1.1	1.1	1.1	1.1	1	1	1.1	1	1	1	1	1	0.8	0.8	0.6	0.8	1.1	1.1	0.6	0.5	0.6	1.1	0.5	1.1	1.1	1.1	1.1	1.1	1.2	1.2	1.1	1.2	1	1.3
CEU	1.1	1	1.1	1.1	1	0.8	1.1	1.1	1.1	1	1.1	1.1	1.1	1.1	1.1	1.1	1.1	1.1	1	1	1.1	1	1	1	1	1	0.8	0.8	0.6	0.8	1.1	1.1	0.6	0.5	0.6	1.1	0.5	1.1	1.1	1.1	1.1	1.1	1.2	1.2	1.1	1.2	1	1.3
GBR	1.1	1	1.1	1.1	1	0.9	1.1	1.1	1.1	1.1	1.1	1.1	1.1	1.1	1.1	1.1	1.1	1.1	1	1	1.1	1	1	1	1	1	0.8	0.8	0.6	0.8	1.1	1.1	0.6	0.5	0.6	1.1	0.5	1.1	1.1	1.1	1.1	1.1	1.2	1.2	1.1	1.2	1	1.3
IBS	1	1	1	1	1	0.8	1	1	1	1	1	1	1	1	1	1	1	1	1	1	1	1	1	1	1	1	0.8	0.7	0.6	0.8	1	1	0.5	0.5	0.6	1.1	0.5	1	1.1	1	1.1	1.1	1.2	1.2	1	1.2	1	1.2
TSI	1	1	1	1	1	0.8	1	1	1	1	1	1.1	1	1	1	1	1.1	1.1	1	1	1	1	1	1	1	1	0.8	0.7	0.6	0.8	1.1	1	0.6	0.5	0.6	1.1	0.5	1	1.1	1.1	1.1	1.1	1.2	1.2	1	1.2	1	1.3
GIH	1	0.9	1	1	0.9	0.7	1	1	0.9	0.9	1	1	1	1	1	1	1	1	0.9	0.9	0.9	0.9	0.9	0.9	0.9	0.9	0.7	0.7	0.5	0.7	1	0.9	0.5	0.5	0.6	1	0.5	1	1	1	1	1	1.1	1.1	1	1.1	0.9	1.2
KHV	1.2	1.2	1.2	1.2	1.2	1.1	1.2	1.2	1.2	1.2	1.2	1.2	1.2	1.2	1.2	1.2	1.2	1.2	1.2	1.1	1.2	1.2	1.1	1.2	1.2	1.2	1	1	1	1	1.2	1.2	0.9	0.9	1	1.2	0.9	1.2	1.2	1.2	1.2	1.2	1.4	1.3	1.2	1.3	1.1	1.4
CDX	1.2	1.2	1.2	1.2	1.2	1.1	1.2	1.2	1.2	1.2	1.2	1.2	1.2	1.2	1.2	1.2	1.2	1.2	1.2	1.2	1.2	1.2	1.2	1.2	1.2	1.2	1.1	1.1	1	1.1	1.2	1.2	1	1	1	1.2	0.9	1.2	1.2	1.3	1.2	1.3	1.4	1.4	1.2	1.3	1.2	1.4
CHB	1.2	1.2	1.2	1.2	1.2	1.1	1.2	1.2	1.2	1.2	1.2	1.3	1.2	1.2	1.2	1.2	1.3	1.2	1.2	1.2	1.2	1.2	1.2	1.2	1.2	1.2	1.1	1	1	1.1	1.2	1.2	1	0.9	1	1.2	0.9	1.2	1.3	1.3	1.3	1.3	1.4	1.4	1.2	1.3	1.2	1.4
CHS	1.2	1.2	1.2	1.2	1.2	1.1	1.2	1.2	1.2	1.2	1.2	1.2	1.2	1.2	1.2	1.2	1.2	1.2	1.2	1.2	1.2	1.2	1.2	1.2	1.2	1.2	1.1	1	1	1.1	1.2	1.2	1	0.9	1	1.2	0.9	1.2	1.3	1.3	1.2	1.3	1.4	1.4	1.2	1.3	1.2	1.4
JPT	1.2	1.2	1.2	1.2	1.2	1.1	1.2	1.2	1.2	1.2	1.2	1.3	1.2	1.2	1.2	1.2	1.2	1.2	1.2	1.2	1.2	1.2	1.2	1.2	1.2	1.2	1.1	1	1	1.1	1.2	1.2	1	0.9	1	1.2	0.9	1.2	1.3	1.3	1.3	1.3	1.4	1.4	1.2	1.3	1.2	1.4
PEL	1.4	1.4	1.4	1.4	1.4	1.3	1.4	1.4	1.4	1.4	1.4	1.4	1.4	1.4	1.4	1.4	1.4	1.4	1.4	1.4	1.4	1.4	1.4	1.4	1.4	1.4	1.3	1.3	1.2	1.3	1.4	1.4	1.2	1.2	1.3	1.4	1.2	1.4	1.4	1.4	1.4	1.4	1.6	1.5	1.4	1.5	1.4	1.6
