# Supplementary material for: Admixture into and within sub-Saharan Africa
Source: eLife. 2016 Jun 21;5:e15266. doi: 10.7554/eLife.15266 (PMC4915815; doi:10.7554/eLife.15266)
Supplement: Figure 2—source data 2. — We used smartpca to compute FST for each pair of populations, upper right diagonal, together with standard errors computed using a block jacknife. FST has been multiplied by 1000. DOI: http://dx.doi.org/10.7554/eLife.15266.010 [file elife-15266-fig2-data2.xlsx]

## Sheet: Figure 2 - Source Data 2
Fst	FIN	CEU	GBR	IBS	TSI	GIH	KHV	CDX	CHB	CHS	JPT	PEL
JOLA	160	157	158	151	153	143	182	186	184	186	186	225
WOLLOF	151	148	149	142	144	135	175	178	177	178	178	217
MANDINKAI	154	151	152	145	147	138	177	180	179	180	180	219
MANDINKAII	153	150	151	144	146	137	176	179	178	180	180	218
SEREHULE	150	148	148	142	143	135	174	178	176	178	178	216
FULAI	112	108	109	102	103	102	147	151	149	151	151	188
MALINKE	154	152	152	146	148	138	177	181	180	181	181	220
SERERE	154	151	152	145	147	137	177	180	179	180	180	219
MANJAGO	154	152	152	146	147	138	178	181	180	181	181	220
FULAII	152	149	150	143	145	136	175	179	177	179	179	217
BAMBARA	155	152	153	147	148	139	178	181	180	181	182	220
AKANS	158	156	157	150	152	142	181	184	183	184	184	223
MOSSI	156	154	154	148	149	140	179	182	181	182	182	221
YORUBA	158	155	156	150	151	141	180	183	182	184	184	222
KASEM	157	155	155	149	150	141	180	183	182	183	183	222
NAMKAM	157	155	155	149	150	141	180	183	182	183	183	222
SEMI-BANTU	157	154	155	149	150	140	179	183	181	183	183	221
BANTU	158	155	156	150	151	141	180	183	182	183	183	222
LUHYA	147	144	145	138	140	130	170	174	172	174	174	213
KAMBE	142	140	140	134	135	127	167	170	169	171	171	209
CHONYI	149	146	147	141	142	133	173	176	175	176	176	215
KAUMA	146	143	144	138	139	130	170	174	172	174	174	213
WASAMBAA	142	139	140	133	135	126	167	170	169	170	170	209
GIRIAMA	148	145	146	140	141	132	172	175	174	175	176	214
WABONDEI	145	142	143	137	138	129	169	173	171	173	173	212
MZIGUA	148	145	146	140	141	132	172	175	174	175	175	214
MAASAI	104		101	94	95	92	137	141	139	141	141	179
WOLAYTA	77	73	73	67	67	70	120	124	122	123	123	159
SOMALI	78	73	74	67	67	71	122	126	124	126	126	162
ARI	115	112	112	106	106	103	147	150	149	150	150	189
SUDANESE	152	150	150	144	146	135	174	178	176	178	178	218
GUMUZ	147	144	145	139	140	130	170	173	172	173	174	213
OROMO	66	61	62	55	55	61	113	117	115	117	117	153
AMHARA	59	53	54	47	46	55	111	115	112	114	114	149
AFAR	64	58	59	52	52	60	114	118	116	117	117	153
ANUAK	150	148	149	143	144	134	173	176	175	176	177	216
TIGRAY	57	51	51	44	44	54	109	113	111	113	113	148
MALAWI	158	156	157	150	152	142	181	184	183	184	184	223
SEBANTU	158	156	157	150	152	142	181	184	183	184	184	223
AMAXHOSA	157	155	156	150	151	141	180	183	182	184	184	222
HERERO	145	143	143	138	139	131	172	175	174	175	176	213
KHWE	160	157	158	152	153	144	183	186	185	187	187	225
/GUI//GANA	190	187	188	182	183	173	212	215	214	215	216	250
KARRETJIE	165	162	163	157	159	150	190	193	192	193	194	232
NAMA	142	139	139	134	135	130	172	176	174	176	176	213
!XUN	193	191	192	186	187	178	216	220	218	220	220	250
KHOMANI	138	135	136	131	132	126	168	172	170	172	172	210
JU/'HOANSI	226	224	224	219	220	210	249	250	250	250	250	250
FIN		6	7	10	12	36	101	106	102	104	104	127
CEU	0.1		0	2	4	35	109	113	110	112	112	134
GBR	0.1	0		3	4	35	109	113	110	112	112	134
IBS	0.1	0.1	0.1		2	36	108	113	110	112	111	136
TSI	0.1	0.1	0.1	0		34	108	113	110	112	112	137
GIH	0.3	0.3	0.3	0.3	0.3		72	77	75	77	76	114
KHV	0.9	1	1	1	1	0.6		2	7	4	14	111
CDX	0.9	1	1	1	1	0.7	0.1		9	6	17	115
CHB	0.9	1	1	1	1	0.7	0.1	0.1		1	7	107
CHS	0.9	1	1	1	1	0.7	0.1	0.1	0		9	110
JPT	0.9	1	1	1	1	0.7	0.2	0.2	0.1	0.1		107
PEL	1.2	1.3	1.3	1.3	1.3	1.1	1.2	1.2	1.2	1.2	1.2
