# Supplementary material for: Admixture into and within sub-Saharan Africa
Source: eLife. 2016 Jun 21;5:e15266. doi: 10.7554/eLife.15266 (PMC4915815; doi:10.7554/eLife.15266)
Supplement: Figure 2—source data 3. — We used smartpca to compute FST for each pair of populations, upper right diagonal, together with standard errors computed using a block jacknife. FST has been multiplied by 1000. DOI: http://dx.doi.org/10.7554/eLife.15266.011 [file elife-15266-fig2-data3.xlsx]

## Sheet: Figure 2 - Source Data 3
TVD	JOLA	WOLLOF	MANDINKAI	MANDINKAII	SEREHULE	FULAI	MALINKE	SERERE	MANJAGO	FULAII	BAMBARA	AKANS	MOSSI	YORUBA	KASEM	NAMKAM	SEMI-BANTU	BANTU	LUHYA	KAMBE	CHONYI	KAUMA	WASAMBAA	GIRIAMA	WABONDEI	MZIGUA	MAASAI	WOLAYTA	SOMALI	ARI	SUDANESE	GUMUZ	OROMO	AMHARA	AFAR	ANUAK	TIGRAY	MALAWI	SEBANTU	AMAXHOSA	HERERO	KHWE	/GUI//GANA	KARRETJIE	NAMA	!XUN	KHOMANI	JU/'HOANSI
JOLA		421	210	364	443	524	487	376	320	447	514	565	558	595	584	583	633	660	702	770	803	800	730	778	727	723	700	670	709	760	612	643	681	695	706	603	691	724	734	739	711	722	757	775	766	783	784	852
WOLLOF	421		230	166	217	415	284	132	223	226	321	402	393	450	439	437	498	538	596	696	749	745	638	715	634	631	613	587	637	701	481	539	603	621	634	469	617	647	665	672	606	641	692	700	686	731	713	843
MANDINKAI	210	230		165	272	429	337	184	165	281	373	445	436	490	477	474	535	571	627	718	765	761	664	734	659	655	640	612	660	717	518	568	626	645	657	508	640	670	683	690	636	662	710	724	711	744	736	846
MANDINKAII	364	166	165		144	412	209	68	146	155	249	341	333	395	384	381	448	491	564	670	727	723	607	689	604	601	582	561	612	691	442	509	577	596	610	428	592	618	637	644	572	613	668	675	664	722	695	839
SEREHULE	443	217	272	144		404	138	171	236	84	182	285	278	344	332	329	401	459	539	649	709	705	583	669	580	577	556	538	594	681	412	487	556	578	593	397	572	595	614	621	545	590	649	653	653	719	684	836
FULAI	524	415	429	412	404		415	420	436	397	434	498	490	543	530	528	590	626	668	751	796	792	700	767	698	695	666	635	677	729	562	598	647	662	674	552	658	708	720	726	668	702	743	742	733	776	752	851
MALINKE	487	284	337	209	138	415		234	294	86	74	207	199	267	258	254	346	409	502	622	683	679	549	642	544	540	531	525	589	682	388	477	547	573	590	372	567	559	578	586	512	554	623	638	652	715	683	831
SERERE	376	132	184	68	171	420	234		159	180	269	353	345	403	393	390	453	494	566	670	727	723	609	690	605	602	585	563	615	693	445	512	580	599	612	431	594	619	637	645	574	614	668	676	666	723	697	839
MANJAGO	320	223	165	146	236	436	294	159		241	324	392	383	439	429	427	484	524	585	687	740	736	627	705	624	620	599	575	626	695	464	526	591	610	623	452	606	636	654	661	590	631	683	686	673	726	702	841
FULAII	447	226	281	155	84	397	86	180	241		127	238	230	298	287	284	367	430	518	634	695	691	563	655	559	556	546	533	595	685	401	483	553	578	594	386	572	574	593	600	528	569	634	645	655	716	686	833
BAMBARA	514	321	373	249	182	434	74	269	324	127		157	150	217	209	205	318	388	484	608	670	666	534	628	529	524	525	525	592	686	382	479	548	577	594	366	570	540	561	570	496	538	611	636	654	713	685	830
AKANS	565	402	445	341	285	498	207	353	392	238	157		77	116	157	149	250	334	441	571	637	633	497	591	488	480	501	526	597	691	374	478	552	581	598	352	575	491	518	527	446	494	579	632	653	706	684	826
MOSSI	558	393	436	333	278	490	199	345	383	230	150	77		150	140	132	276	359	464	590	652	647	517	609	509	502	518	531	600	695	381	484	556	585	602	362	579	514	539	547	471	515	594	638	659	711	690	830
YORUBA	595	450	490	395	344	543	267	403	439	298	217	116	150		190	184	190	273	404	536	607	604	461	556	452	442	482	532	602	697	376	479	557	587	604	358	581	447	477	486	401	462	567	634	654	701	684	824
KASEM	584	439	477	384	332	530	258	393	429	287	209	157	140	190		9	310	387	498	615	670	666	546	630	539	531	545	546	613	706	403	500	569	597	614	389	590	538	562	570	502	540	613	650	672	715	701	832
NAMKAM	583	437	474	381	329	528	254	390	427	284	205	149	132	184	9		304	383	494	612	667	663	543	627	535	527	542	544	611	706	400	498	568	597	613	386	590	534	558	567	497	536	611	649	671	715	700	832
SEMI-BANTU	633	498	535	448	401	590	346	453	484	367	318	250	276	190	310	304		126	293	449	552	551	345	474	335	325	453	527	597	693	373	475	554	584	601	357	578	327	364	374	338	439	549	615	632	688	663	813
BANTU	660	538	571	491	459	626	409	494	524	430	388	334	359	273	387	383	126		287	443	547	545	331	466	320	310	456	536	606	700	401	499	563	593	610	388	587	307	347	357	338	436	545	617	634	685	665	810
LUHYA	702	596	627	564	539	668	502	566	585	518	484	441	464	404	498	494	293	287		413	535	534	288	449	282	274	405	510	560	660	404	483	528	554	565	391	549	301	341	351	364	448	555	617	633	694	666	818
KAMBE	770	696	718	670	649	751	622	670	687	634	608	571	590	536	615	612	449	443	413		222	185	339	93	336	332	555	641	671	726	589	630	654	669	676	583	666	354	390	406	494	540	585	642	667	708	691	829
CHONYI	803	749	765	727	709	796	683	727	740	695	670	637	652	607	670	667	552	547	535	222		258	464	265	461	457	630	702	728	777	669	701	714	728	733	662	725	460	500	514	583	612	638	693	725	738	740	837
KAUMA	800	745	761	723	705	792	679	723	736	691	666	633	647	604	666	663	551	545	534	185	258		463	215	460	456	625	696	723	772	664	695	709	723	728	657	720	461	500	514	581	608	634	689	721	735	736	837
WASAMBAA	730	638	664	607	583	700	549	609	627	563	534	497	517	461	546	543	345	331	288	339	464	463		378	48	98	456	558	601	671	479	543	576	596	606	470	593	176	256	286	402	457	545	607	623	692	657	815
GIRIAMA	778	715	734	689	669	767	642	690	705	655	628	591	609	556	630	627	474	466	449	93	265	215	378		375	371	582	663	692	746	616	652	676	691	697	610	688	381	419	433	519	556	598	660	686	713	709	831
WABONDEI	727	634	659	604	580	698	544	605	624	559	529	488	509	452	539	535	335	320	282	336	461	460	48	375		64	463	566	610	680	480	549	584	605	615	471	602	147	237	269	391	445	540	604	620	690	653	814
MZIGUA	723	631	655	601	577	695	540	602	620	556	524	480	502	442	531	527	325	310	274	332	457	456	98	371	64		467	570	615	687	478	551	588	609	619	467	606	125	226	258	384	441	539	606	622	689	655	813
MAASAI	700	613	640	582	556	666	531	585	599	546	525	501	518	482	545	542	453	456	405	555	630	625	456	582	463	467		359	409	561	340	376	373	400	415	310	396	497	514	521	447	514	582	569	593	699	610	816
WOLAYTA	670	587	612	561	538	635	525	563	575	533	525	526	531	532	546	544	527	536	510	641	702	696	558	663	566	570	359		239	479	392	350	75	137	176	367	134	599	601	608	527	580	628	565	587	705	581	816
SOMALI	709	637	660	612	594	677	589	615	626	595	592	597	600	602	613	611	597	606	560	671	728	723	601	692	610	615	409	239		549	472	433	224	235	215	449	229	646	651	657	581	631	665	597	610	727	600	831
ARI	760	701	717	691	681	729	682	693	695	685	686	691	695	697	706	706	693	700	660	726	777	772	671	746	680	687	561	479	549		589	545	517	538	548	572	542	720	719	723	673	705	721	675	669	751	684	837
SUDANESE	612	481	518	442	412	562	388	445	464	401	382	374	381	376	403	400	373	401	404	589	669	664	479	616	480	478	340	392	472	589		313	419	458	477	84	452	506	537	547	465	527	601	605	623	704	648	820
GUMUZ	643	539	568	509	487	598	477	512	526	483	479	478	484	479	500	498	475	499	483	630	701	695	543	652	549	551	376	350	433	545	313		374	409	436	287	407	579	590	597	516	569	632	596	612	705	633	822
OROMO	681	603	626	577	556	647	547	580	591	553	548	552	556	557	569	568	554	563	528	654	714	709	576	676	584	588	373	75	224	517	419	374		70	124	395	72	618	622	628	549	601	644	578	596	713	589	822
AMHARA	695	621	645	596	578	662	573	599	610	578	577	581	585	587	597	597	584	593	554	669	728	723	596	691	605	609	400	137	235	538	458	409	70		124	435	50	640	644	650	573	624	659	591	604	722	595	827
AFAR	706	634	657	610	593	674	590	612	623	594	594	598	602	604	614	613	601	610	565	676	733	728	606	697	615	619	415	176	215	548	477	436	124	124		454	117	651	655	661	585	635	668	599	610	727	600	830
ANUAK	603	469	508	428	397	552	372	431	452	386	366	352	362	358	389	386	357	388	391	583	662	657	470	610	471	467	310	367	449	572	84	287	395	435	454		427	496	527	537	452	517	592	594	617	701	639	817
TIGRAY	691	617	640	592	572	658	567	594	606	572	570	575	579	581	590	590	578	587	549	666	725	720	593	688	602	606	396	134	229	542	452	407	72	50	117	427		636	641	647	569	620	657	589	604	721	595	827
MALAWI	724	647	670	618	595	708	559	619	636	574	540	491	514	447	538	534	327	307	301	354	460	461	176	381	147	125	497	599	646	720	506	579	618	640	651	496	636		194	233	378	448	529	604	633	681	660	805
SEBANTU	734	665	683	637	614	720	578	637	654	593	561	518	539	477	562	558	364	347	341	390	500	500	256	419	237	226	514	601	651	719	537	590	622	644	655	527	641	194		44	343	377	409	468	514	586	541	714
AMAXHOSA	739	672	690	644	621	726	586	645	661	600	570	527	547	486	570	567	374	357	351	406	514	514	286	433	269	258	521	608	657	723	547	597	628	650	661	537	647	233	44		342	379	395	453	499	577	525	709
HERERO	711	606	636	572	545	668	512	574	590	528	496	446	471	401	502	497	338	338	364	494	583	581	402	519	391	384	447	527	581	673	465	516	549	573	585	452	569	378	343	342		355	447	449	430	593	492	723
KHWE	722	641	662	613	590	702	554	614	631	569	538	494	515	462	540	536	439	436	448	540	612	608	457	556	445	441	514	580	631	705	527	569	601	624	635	517	620	448	377	379	355		367	465	451	469	507	607
/GUI//GANA	757	692	710	668	649	743	623	668	683	634	611	579	594	567	613	611	549	545	555	585	638	634	545	598	540	539	582	628	665	721	601	632	644	659	668	592	657	529	409	395	447	367		350	357	473	401	603
KARRETJIE	775	700	724	675	653	742	638	676	686	645	636	632	638	634	650	649	615	617	617	642	693	689	607	660	604	606	569	565	597	675	605	596	578	591	599	594	589	604	468	453	449	465	350		202	519	186	643
NAMA	766	686	711	664	653	733	652	666	673	655	654	653	659	654	672	671	632	634	633	667	725	721	623	686	620	622	593	587	610	669	623	612	596	604	610	617	604	633	514	499	430	451	357	202		483	129	615
!XUN	783	731	744	722	719	776	715	723	726	716	713	706	711	701	715	715	688	685	694	708	738	735	692	713	690	689	699	705	727	751	704	705	713	722	727	701	721	681	586	577	593	469	473	519	483		521	414
KHOMANI	784	713	736	695	684	752	683	697	702	686	685	684	690	684	701	700	663	665	666	691	740	736	657	709	653	655	610	581	600	684	648	633	589	595	600	639	595	660	541	525	492	507	401	186	129	521		640
JU/'HOANSI	852	843	846	839	836	851	831	839	841	833	830	826	830	824	832	832	813	810	818	829	837	837	815	831	814	813	816	816	831	837	820	822	822	827	830	817	827	805	714	709	723	607	603	643	615	414	640
FIN	886	859	869	854	847	860	851	856	854	852	854	859	860	864	868	868	863	869	855	867	891	889	855	880	857	861	790	664	706	813	823	798	635	610	630	816	595	882	877	879	825	870	874	781	794	884	757	894
CEU	857	827	838	821	814	829	817	823	822	819	820	825	827	830	836	836	828	833	814	837	865	862	815	851	820	825	741	608	659	769	776	750	578	552	577	768	535	849	845	847	790	835	841	747	760	851	724	866
GBR	861	832	842	826	819	834	822	828	827	823	825	830	832	836	841	840	833	839	820	842	869	866	820	856	825	830	748	616	666	776	783	757	587	562	584	775	546	854	850	852	795	841	846	753	765	856	729	870
IBS	827	797	808	790	783	800	786	792	792	788	789	794	797	800	806	805	798	807	785	812	848	845	786	828	793	799	702	567	616	731	733	708	536	511	534	726	493	825	821	822	765	810	816	723	734	829	700	856
TSI	835	805	816	798	791	808	793	800	800	795	797	802	804	808	813	813	806	813	791	817	850	846	791	832	799	804	705	572	621	734	739	713	541	515	540	731	497	831	827	828	772	816	822	729	740	834	705	856
GIH	841	812	822	805	798	814	801	807	807	803	805	810	812	816	821	821	814	820	799	820	850	847	799	834	804	810	729	597	646	754	763	738	566	540	564	756	522	835	831	832	776	820	826	733	745	837	709	857
KHV	871	846	854	842	836	844	840	843	841	841	843	848	848	853	855	854	852	857	847	855	876	873	847	867	848	852	782	716	736	805	815	790	711	707	713	808	704	870	865	867	813	859	862	769	785	871	757	881
CDX	878	856	863	852	846	853	850	853	851	851	853	858	859	863	864	864	862	867	858	866	884	882	857	876	859	863	793	738	759	815	825	800	736	735	740	818	732	879	874	876	822	868	871	783	800	879	779	890
CHB	869	844	852	840	834	842	838	841	839	839	841	846	847	851	853	853	850	856	845	854	875	872	845	865	846	850	780	705	728	803	813	788	701	697	703	806	695	869	864	865	811	857	860	767	783	869	751	880
CHS	871	846	854	842	837	844	840	844	842	842	843	848	849	853	855	855	853	858	848	856	877	874	847	867	849	853	782	720	740	805	816	790	715	714	719	808	711	871	866	867	813	859	863	770	787	871	761	882
JPT	873	850	858	846	840	847	844	847	845	845	847	852	852	857	859	858	856	861	852	860	880	877	851	870	853	856	786	720	741	809	819	794	716	714	719	812	712	874	869	871	817	863	866	773	790	874	763	885
PEL	861	833	843	828	822	834	826	830	829	827	829	835	836	840	843	843	840	846	831	843	867	864	830	855	833	837	765	633	682	789	799	774	615	600	615	792	591	859	854	856	801	846	851	757	771	860	734	874
