# Supplementary material for: Admixture into and within sub-Saharan Africa
Source: eLife. 2016 Jun 21;5:e15266. doi: 10.7554/eLife.15266 (PMC4915815; doi:10.7554/eLife.15266)
Supplement: Figure 2—source data 4. — TVD has been multiplied by 1000. DOI: http://dx.doi.org/10.7554/eLife.15266.012 [file elife-15266-fig2-data4.xlsx]

## Sheet: Figure 2 - Source Data 4
	FIN	CEU	GBR	IBS	TSI	GIH	KHV	CDX	CHB	CHS	JPT	PEL
JOLA	886	857	861	827	835	841	871	878	869	871	873	861
WOLLOF	859	827	832	797	805	812	846	856	844	846	850	833
MANDINKAI	869	838	842	808	816	822	854	863	852	854	858	843
MANDINKAII	854	821	826	790	798	805	842	852	840	842	846	828
SEREHULE	847	814	819	783	791	798	836	846	834	837	840	822
FULAI	860	829	834	800	808	814	844	853	842	844	847	834
MALINKE	851	817	822	786	793	801	840	850	838	840	844	826
SERERE	856	823	828	792	800	807	843	853	841	844	847	830
MANJAGO	854	822	827	792	800	807	841	851	839	842	845	829
FULAII	852	819	823	788	795	803	841	851	839	842	845	827
BAMBARA	854	820	825	789	797	805	843	853	841	843	847	829
AKANS	859	825	830	794	802	810	848	858	846	848	852	835
MOSSI	860	827	832	797	804	812	848	859	847	849	852	836
YORUBA	864	830	836	800	808	816	853	863	851	853	857	840
KASEM	868	836	841	806	813	821	855	864	853	855	859	843
NAMKAM	868	836	840	805	813	821	854	864	853	855	858	843
SEMI-BANTU	863	828	833	798	806	814	852	862	850	853	856	840
BANTU	869	833	839	807	813	820	857	867	856	858	861	846
LUHYA	855	814	820	785	791	799	847	858	845	848	852	831
KAMBE	867	837	842	812	817	820	855	866	854	856	860	843
CHONYI	891	865	869	848	850	850	876	884	875	877	880	867
KAUMA	889	862	866	845	846	847	873	882	872	874	877	864
WASAMBAA	855	815	820	786	791	799	847	857	845	847	851	830
GIRIAMA	880	851	856	828	832	834	867	876	865	867	870	855
WABONDEI	857	820	825	793	799	804	848	859	846	849	853	833
MZIGUA	861	825	830	799	804	810	852	863	850	853	856	837
MAASAI	790	741	748	702	705	729	782	793	780	782	786	765
WOLAYTA	664	608	616	567	572	597	716	738	705	720	720	633
SOMALI	706	659	666	616	621	646	736	759	728	740	741	682
ARI	813	769	776	731	734	754	805	815	803	805	809	789
SUDANESE	823	776	783	733	739	763	815	825	813	816	819	799
GUMUZ	798	750	757	708	713	738	790	800	788	790	794	774
OROMO	635	578	587	536	541	566	711	736	701	715	716	615
AMHARA	610	552	562	511	515	540	707	735	697	714	714	600
AFAR	630	577	584	534	540	564	713	740	703	719	719	615
ANUAK	816	768	775	726	731	756	808	818	806	808	812	792
TIGRAY	595	535	546	493	497	522	704	732	695	711	712	591
MALAWI	882	849	854	825	831	835	870	879	869	871	874	859
SEBANTU	877	845	850	821	827	831	865	874	864	866	869	854
AMAXHOSA	879	847	852	822	828	832	867	876	865	867	871	856
HERERO	825	790	795	765	772	776	813	822	811	813	817	801
KHWE	870	835	841	810	816	820	859	868	857	859	863	846
/GUI//GANA	874	841	846	816	822	826	862	871	860	863	866	851
KARRETJIE	781	747	753	723	729	733	769	783	767	770	773	757
NAMA	794	760	765	734	740	745	785	800	783	787	790	771
!XUN	884	851	856	829	834	837	871	879	869	871	874	860
KHOMANI	757	724	729	700	705	709	757	779	751	761	763	734
JU/'HOANSI	894	866	870	856	856	857	881	890	880	882	885	874
FIN		341	354	378	378	523	733	754	725	740	738	620
CEU	341		50	107	136	452	704	732	695	711	711	573
GBR	354	50		126	153	463	709	735	700	716	716	579
IBS	378	107	126		87	431	702	730	693	709	710	568
TSI	378	136	153	87		416	692	720	682	698	699	558
GIH	523	452	463	431	416		617	645	608	624	625	483
KHV	733	704	709	702	692	617		146	157	137	253	488
CDX	754	732	735	730	720	645	146		217	191	300	516
CHB	725	695	700	693	682	608	157	217		34	193	474
CHS	740	711	716	709	698	624	137	191	34		214	495
JPT	738	711	716	710	699	625	253	300	193	214		491
PEL	620	573	579	568	558	483	488	516	474	495	491
