# Supplementary material for: Admixture into and within sub-Saharan Africa
Source: eLife. 2016 Jun 21;5:e15266. doi: 10.7554/eLife.15266 (PMC4915815; doi:10.7554/eLife.15266)
Supplement: Figure 3—source data 1. — For each event in each ethnic group we show the largest inferred amplitude and date of an admixture event involving two reference populations (Pop1 and Pop2). We additionally provide the ancestry region identity of the two main reference populations, together with Z scores for curve comparisons between this best curve and those containing populations from different ancestry regions. We use a cut-off of Z< 2 to decide whether sources from multiple ancestries best describe the admixture source. DOI: http://dx.doi.org/10.7554/eLife.15266.015 [file elife-15266-fig3-data1.xlsx]

## Sheet: Figure 3 - Source Data1
Ethnic Group	amplitude	Date	Date(CI)	Pop1	Pop1Anc	Pop1Anc-West Africa NC(Z)	Pop1Anc-Central West Africa NC(Z)	Pop1Anc-East Africa NC (Z)	Pop1Anc-NiloSaharan (Z)	Pop1Anc-Afroasiatic (Z)	Pop1Anc-South Africa NC (Z)	Pop1Anc-Khoesan (Z)	Pop1Anc-Eurasia (Z)	Pop1Anc (Z)	Pop2	Pop2Anc	Pop2Anc-West Africa NC(Z)	Pop2Anc-Central West Africa NC(Z)	Pop2Anc-East Africa NC (Z)	Pop2Anc-NiloSaharan (Z)	Pop2Anc-Afroasiatic (Z)	Pop2Anc-South Africa NC (Z)	Pop2Anc-Khoesan (Z)	Pop2Anc-Eurasia (Z)	Pop2Anc (Z)
JOLA	7.3e-05	148	31	JU/'HOANSI	Khoesan	0.57	0.43	0.72	0.69	2.25	0.22	0		0.22	GBR	Eurasia				3.27	2.39	3.33		0	1.89
WOLLOF	0.0001	88	22	AKANS	Central West Africa NC	0	0	0.63	1.11	3.42	0.35	0.17		0	GBR	Eurasia	6.51		6.43	5.74	3.57		6.16	0	3.21
WOLLOF	2.3e-05	10	3	NAMKAM	Central West Africa NC	-0.22	0	0.79	1.35	3.39	0.23	0.18		-0.22	TSI	Eurasia	6.66		6.66	6.01	3.81		6.45	0	3.81
MANDINKAI
MANDINKAII	3.7e-05	19	3	JU/'HOANSI	Khoesan	0.39	0.06	0.78	1.04	4.21	0.33	0		0.06	IBS	Eurasia	7.56	7.66	7.95	7.53	4.68	7.8		0	4.67
SEREHULE	6.3e-05	23	5	AKANS	Central West Africa NC	0.43	0	0.52	1.01	3.47	0.23	0.2		0.2	IBS	Eurasia	6.17		6.22	5.52	3.43	6.26	5.88	0	3.43
FULAI	0.00044	60	8	JOLA	West Africa NC	0	0.1	1.02	1.15	4.59	0.4	0.79		0.1	CEU	Eurasia			9.03	8.17	5.28		8.99	0	5.28
FULAI	0.00016	11	2	AKANS	Central West Africa NC	-0.19	0	0.87	1.17	4.72	0.26	0.72		-0.19	IBS	Eurasia			9.82	8.91	5.78		9.81	0	5.78
MALINKE	8.9e-05	108	24	YORUBA	Central West Africa NC	0.03	0	0.27	0.9	1.55	0.24	0.11		0.03	PEL	Eurasia	2.47		2.55	2.27	1.43		2.03	0	1.39
MALINKE	1.9e-05	8	2	BANTU	Central West Africa NC	-0.27	0	-0.18	0.3	1.24	0.1	-0.44		0.1	TSI	Eurasia	2.63		2.68	2.32	1.52		1.79	0	1.74
SERERE	2.5e-05	14	3	BANTU	Central West Africa NC	0.8	0	1	1.19	4.83	0.53	0.69		0.53	GBR	Eurasia	8.39		8.46	7.48	4.64	8.42	7.96	0	4.64
MANJAGO	3.4e-05	3	1	AKANS	Central West Africa NC	0.24	0	0.92	1.73	6.49	0.25	0.86		0.24	GBR	Eurasia	12.37		13.06	12.08	8.21	12.96	12.4	0	8.21
FULAII	2e-05	5	1	JU/'HOANSI	Khoesan	0.09	0.2	1.16	2.17	5.69	0.36	0		0.09	GBR	Eurasia	10.33	10.21	10.51	9.27	5.86	10.37		0	5.86
FULAII	7.6e-05	67	10	SEMI-BANTU	Central West Africa NC	0.18	0	0.78	1.74	5.3	-0.02	-0.01		0.18	TSI	Eurasia	10.01		9.96	8.85	5.56		9.96	0	5.56
BAMBARA	2.2e-05	15	4	/GUI//GANA	Khoesan	0.62	0.31	0.69	0.67	2.94	0.25	0		0.25	IBS	Eurasia	5.62		5.63	4.97	3.35	5.63		0	3.35
AKANS
MOSSI	0.00056	221	56	MALAWI	South Africa NC	0.05	0.15	0.06	0.72	0.88	0	0.65		0.05	GBR	Eurasia	0.83			0.92	0.58			0	0.35
MOSSI	5.2e-06	8	2	/GUI//GANA	Khoesan	0.16	-0.62	-0.5	0.85	1.34	-0.43	0		-0.43	CEU	Eurasia					1.13			0	1.13
YORUBA
KASEM
NAMKAM
SEMI-BANTU
BANTU	2.3e-05	56	12	MOSSI	Central West Africa NC	0	0	0.2	0.77	0.25	1.06			0	JU/'HOANSI	Khoesan						0.93	0		0.81
LUHYA	7e-05	25	2	AKANS	Central West Africa NC	0.97	0		7.52	11.82	1.74	2.63		0.97	TSI	Eurasia	14.05			9.63	4.45		12.19	0	4.45
KAMBE	0.00014	15	2	YORUBA	Central West Africa NC	0.23	0		2.1	6.27	1.21	1.21		0.23	TSI	Eurasia	10.74			9.31	5.67	10.67	9.83	0	5.67
CHONYI	0.00014	27	2	YORUBA	Central West Africa NC	0.17	0		3.28	9.02	1.89	1.65		0.17	TSI	Eurasia	14.04			13.89	7.89		13.04	0	7.89
KAUMA	0.00015	26	2	SEMI-BANTU	Central West Africa NC	0.21	0		3.09	8.19		1.39		0.21	TSI	Eurasia	13.2			12.05	6.52		11.74	0	6.52
WASAMBAA	0.00012	20	3	NAMKAM	Central West Africa NC	0.14	0		2.4	6.34	1.14	1.44		0.14	TSI	Eurasia	9.03			7.79	3.78	8.96	7.5	0	3.78
GIRIAMA	0.00014	28	2	YORUBA	Central West Africa NC	0.63	0		4.08	9.3		2.09		0.63	TSI	Eurasia	13.07			12.71	6.51		12.43	0	6.51
WABONDEI	0.0001	23	2	MOSSI	Central West Africa NC	0.16	0		2.94	8.04	1.41	1.97		0.16	TSI	Eurasia	11.24			10.52	5.3	12.03	9.59	0	5.3
MZIGUA	0.00011	32	4	YORUBA	Central West Africa NC	0.18	0		1.98	5.11		1.12		0.18	TSI	Eurasia	7.41			7.11	3.66		6.68	0	3.66
MAASAI	0.00037	74	15	SUDANESE	Nilo-Saharan	0.23	0.08	0.5	0	3.35	0.09	0.54		0.08	TSI	Eurasia	5.09	5.66	5.58		2.94	5.62	5.3	0	2.79
MAASAI	8e-05	10	2	SEMI-BANTU	Central West Africa NC	0.44	0	0.47	-0.08	4.06	0.27	0.65		0.27	TSI	Eurasia	6.94			7.36	3.72	7.35	7.41	0	3.72
SUDANESE	1.7e-05	6	2	JU/'HOANSI	Khoesan	0.42	0.22	0.83	1.39	4.11	0.55	0		0.22	GBR	Eurasia	5.28	5.55		4.38	2.62	5.81		0	2.62
GUMUZ	1.9e-05	5	1	SUDANESE	Nilo-Saharan	0.53	0.27	0.62	0	2.23	0.59	0.27		0.27	GBR	Eurasia	5.62	5.88	5.87		3.68	5.51	5.33	0	3.58
GUMUZ	7.9e-05	103	25	SUDANESE	Nilo-Saharan	0.66	0.35	1.09	0	2.14	0.54	0.65		0.65	TSI	Eurasia	5.46	5.73	5.7		3.63	5.36	5.37	0	3.77
ANUAK	3.3e-05	47	12	SUDANESE	Nilo-Saharan	1.62	1.59	1.71	0	1.47	2.4		0.81	0.21	JU/'HOANSI	Khoesan	1.28	1.27	1.23		2.23	0.55	0	1.4	0.21
AFAR	0.00039	45	10	SUDANESE	Nilo-Saharan	0.39	0.25	0.56	0	2.08	0.33	0.39		0.25	TSI	Eurasia	5.03	4.99			3.78	5.03	5.09	0	3.68
OROMO	0.00066	84	8	JU/'HOANSI	Khoesan	0.79	0.58	0.75	0.33	2.07	0.61	0		0.33	TSI	Eurasia	6.72	7.5	7.46	7.05	4.62	7.52		0	4.62
OROMO	4.9e-05	7	2	GUMUZ	Nilo-Saharan	-0.07	-0.2	0.17	0	1.33	-0.15	-0.74		-0.74	TSI	Eurasia	6.57		7.13		5.73		6.47	0	3.91
SOMALI	0.00045	70	11	SUDANESE	Nilo-Saharan	0.3	0.09	0.79	0	2.74	0.29	0.66		0.09	TSI	Eurasia	5.5	5.8	5.74		3.96	5.78		0	3.87
WOLAYTA	0.00056	56	9	JU/'HOANSI	Khoesan	0.72	0.48	0.82	0.39	1.2	0.37	0		0.37	TSI	Eurasia	4.53	5.16	5.09	4.58	2.87	5.11		0	2.87
ARI	0.00045	97	10	JU/'HOANSI	Khoesan	0.95	0.72	1.09	0.7	3.38	0.61	0		0.61	TSI	Eurasia				5.11	2.82	6.01		0	2.82
AMHARA	0.00052	64	9	SUDANESE	Nilo-Saharan	0.47	0.25	0.87	0	2.06	0.4	0.28		0.25	GBR	Eurasia	6.68	6.77	6.85		4.93	6.83		0	4.37
TIGRAY	0.00067	75	8	SUDANESE	Nilo-Saharan	0.61	0.42	0.78	0	2.47	0.46	0.43		0.42	TSI	Eurasia	7.97				5.92	8.29		0	5.87
MALAWI	3.9e-05	41	6	YORUBA	Central West Africa NC	0.34	0		1.33	1.17			0.25	0.25	JU/'HOANSI	Khoesan				4.68	4.19		0	2.74	2.74
SEBANTU
AMAXHOSA	5e-05	17	3	MANDINKAI	West Africa NC	0	0.15		1.78	5.18	1.79			0.15	GBR	Eurasia		6.93		6.36	3.88			0	3.82
HERERO	0.00025	2	0	JU/'HOANSI	Khoesan	1.5	1.06	1.88	2.81	6.67	1	0		1	GBR	Eurasia	12.04	12.06	12.16	11.4	8.11	12.58		0	8.11
KHWE	0.00017	85	25	SEMI-BANTU	Central West Africa NC	0.64	0	0.12	0.89	1.6				0.12	PEL	Eurasia	2.35		2.53	1.95	0.98			0	0.98
KHWE	3.9e-05	17	5	BANTU	Central West Africa NC	0	0	0.11	0.46	1.15				0	TSI	Eurasia	2.01		2.19	2.04	1.53			0	1.53
/GUI//GANA	3.8e-05	20	4	JOLA	West Africa NC	0	0.22		1.6	3.27				0.22	TSI	Eurasia		7.15		6.02	3.45			0	3.01
KARRETJIE	0.00047	5	0	BANTU	Central West Africa NC	0.74	0		2.33	7				0.74	GBR	Eurasia	19.76			19.43	13.76			0	13.76
NAMA	0.00027	4	0	BANTU	Central West Africa NC	0.53	0	0.73	1.53	5.33				0.53	GBR	Eurasia	14.83		14.81	14.59	10.23			0	10.23
NAMA	0.00024	64	10	BANTU	Central West Africa NC	0.82	0	0.85	1.65	8.99				0.82	GBR	Eurasia	14.83		14.83	14.59	10.57			0	10.57
!XUN	0.00011	50	6	MALAWI	South Africa NC	0.3	0.05	0.66	1.53	2.99	0			0.05	TSI	Eurasia	5.36		5.99	4.9	2.65			0	2.65
KHOMANI	0.0005	5	0	BANTU	Central West Africa NC	0.73	0		2.06	14.81				0.73	GBR	Eurasia	19.98			19.7	14.19			0	14.19
JU/'HOANSI	9e-05	41	6	AKANS	Central West Africa NC	0.21	0	0.59	1.76	4.73	0.06			0.06	TSI	Eurasia	8.7		9.51	7.87	4.17	9.44		0	3.68
