# Supplementary material for: Admixture into and within sub-Saharan Africa
Source: eLife. 2016 Jun 21;5:e15266. doi: 10.7554/eLife.15266 (PMC4915815; doi:10.7554/eLife.15266)
Supplement: Figure 3—source data 2. — Columns as in Figure 3—source data 1. DOI: http://dx.doi.org/10.7554/eLife.15266.016 [file elife-15266-fig3-data2.xlsx]

## Sheet: Figure 3 - Source Data 2
Ethnic Group	amplitude	Date	Date(CI)	Pop1	Pop1Anc	Pop1Anc-West Africa NC(Z)	Pop1Anc-Central West Africa NC(Z)	Pop1Anc-East Africa NC (Z)	Pop1Anc-NiloSaharan (Z)	Pop1Anc-Afroasiatic (Z)	Pop1Anc-South Africa NC (Z)	Pop1Anc-Khoesan (Z)	Pop1Anc-Eurasia (Z)	Pop1Anc (Z)	Pop2	Pop2Anc	Pop2Anc-West Africa NC(Z)	Pop2Anc-Central West Africa NC(Z)	Pop2Anc-East Africa NC (Z)	Pop2Anc-NiloSaharan (Z)	Pop2Anc-Afroasiatic (Z)	Pop2Anc-South Africa NC (Z)	Pop2Anc-Khoesan (Z)	Pop2Anc-Eurasia (Z)	Pop2Anc (Z)
JOLA	2.4e-05	121	36	/GUI//GANA	Khoesan	0.39	0.32	0.44	0.34		0.32	0		0.32	CDX	Eurasia	2.53			2.36	1.54	2.61		0	1.54
WOLLOF	0.00017	153	38	MANDINKAII	West Africa NC	0	0.8	1	1.25	2	0.83	1.03		0.8	TSI	Eurasia		2.82	2.81	2.68	1.57	2.79	2.68	0	1.57
WOLLOF	2.4e-05	16	5	JOLA	West Africa NC	0	0.87	1.1	1.41	2.23	1.01	1.15		0.87	TSI	Eurasia		3.18	3.18	3.17	1.67	3.12	3	0	1.67
MANDINKAI
MANDINKAII	3.7e-05	29	5	SEMI-BANTU	Central West Africa NC	0.53	0	0.93	1.12	4.07	0.39	0.12		0.12	IBS	Eurasia	6.33		7.7	7.02	4.51	7.79	7.22	0	4.51
SEREHULE	5.7e-05	32	7	BANTU	Central West Africa NC	0.6	0	0.61	0.97	3.71	0.4	0.22		0.22	IBS	Eurasia	6.6		6.61	5.85	3.8		6.26	0	3.8
FULAI	0.00041	86	11	SEMI-BANTU	Central West Africa NC	0.08	0	0.89	1.28	5.26	0.21	0.81		0.08	IBS	Eurasia	11.6		11.46	10.28	6.63		11.57	0	6.45
FULAI	0.00015	16	2	AKANS	Central West Africa NC	-0.15	0	0.75	0.87	4.09	0.04	0.43		-0.15	TSI	Eurasia	8.62		8.53	7.68	5.13		8.59	0	5.13
MALINKE	0.00021	200	45	BAMBARA	West Africa NC	0	0.58	0.63	0.8	0.99	0.39	0.57		0.39	JPT	Eurasia		1.21	1.21	1.15	0.78	1.15		0	0.78
MALINKE	1.9e-05	13	2	SEMI-BANTU	Central West Africa NC	-0.24	0	0.03	0.56	1.26	-0.15	-0.22		-0.15	TSI	Eurasia	2.06		2.17	2.04	0.99		0.88	0	1.25
SERERE	2.5e-05	22	4	BANTU	Central West Africa NC	0.6	0	1.08	1.38	4.94	0.83	0.92		0.6	GBR	Eurasia	6.65		8.32	7.37	4.63	8.29	7.9	0	4.63
MANJAGO	3e-05	4	1	AKANS	Central West Africa NC	0.13	0	0.47	0.92	3.36	0.11	0.44		0.11	GBR	Eurasia	6.41		6.76	6.23	4.21	6.72	6.41	0	4.21
FULAII	7.1e-05	91	22	JOLA	West Africa NC	0	0.11	0.52	0.68	2.07	0.27	0.53		0.11	TSI	Eurasia		3.16	3.08	2.88	1.97	3.12	2.89	0	1.94
FULAII	1.8e-05	7	2	JU/'HOANSI	Khoesan	-0.93	-0.96	-0.41	-0.38	2.79	-0.84	0		-0.93	GBR	Eurasia	6.08	5.71		5.84	4.11	5.23		0	4.11
BAMBARA	2.1e-05	22	6	/GUI//GANA	Khoesan	0.45	0.15	0.56	0.6	2.78	0.01	0		0.01	IBS	Eurasia	5.36				3.17			0	3.17
AKANS
MOSSI	7.3e-06	17	5	/GUI//GANA	Khoesan	0.17	0.24	0.29	0.73	4.92	0.15	0		0.15	CEU	Eurasia	5.47			5.27	3.13			0	3.13
YORUBA
KASEM	1.9e-06	25	7	GUMUZ	Nilo-Saharan				0					4.91	JU/'HOANSI	Khoesan	3.26				2.83		0		2.1
NAMKAM
SEMI-BANTU
BANTU	2.3e-05	84	23	FULAI	West Africa NC	0	0.13		0.96	0.42				0.13	JU/'HOANSI	Khoesan		3.04	2.93			2.31	0		0.63
LUHYA	8.7e-05	79	18	MALAWI	South Africa NC	0.89	0.18	0.61	1.41	4.02	0	0.65		0.18	TSI	Eurasia	4.3	3.87		3.29	1.57		3.09	0	1.57
LUHYA	2.2e-05	18	6	YORUBA	Central West Africa NC	-0.18	0	-0.35	0.98	4.25	-1	0.85		-1	TSI	Eurasia	5.93			3.98	2.02	4.23	4.83	0	2.02
KAMBE	0.00013	22	3	YORUBA	Central West Africa NC	0.08	0		1.77	5.34	0.24	0.69		0.08	TSI	Eurasia	8.56			7.99	4.93		8.52	0	4.93
CHONYI	0.00013	40	3	YORUBA	Central West Africa NC	0.02	0		3.09	9.17	0.31	1.66		0.02	TSI	Eurasia	14.27			13.25	7.94		13.21	0	7.94
KAUMA	0.00014	40	3	SEMI-BANTU	Central West Africa NC	0.33	0		3.02	7.44	0.21	0.75		0.21	TSI	Eurasia	11.04			10.01	5.92	11.85	10.72	0	5.92
WASAMBAA	0.00013	58	14	BANTU	Central West Africa NC	0.12	0		1.26	3.93	0.03	0.46		0.03	TSI	Eurasia	5.25			4.39	2.47	4.9	4.54	0	2.29
WASAMBAA	2.5e-05	11	3	YORUBA	Central West Africa NC	0.3	0		1.25	3.96	0.21	0.91		0.21	GBR	Eurasia	5.22			4.36	2.37	4.88	4.78	0	2.37
GIRIAMA	0.00014	43	3	YORUBA	Central West Africa NC	0.49	0		3.88	8.92	0.35	1.66		0.35	TSI	Eurasia	12.4			10.92	6.16	12.29	11.83	0	6.16
WABONDEI	0.00013	78	17	AMAXHOSA	South Africa NC	0.22	0.02		1	2.43	0	0.11		0.02	GBR	Eurasia	2.97	2.87		2.85	1.58		3.41	0	1.59
WABONDEI	3e-05	14	4	BANTU	Central West Africa NC	0.25	0		1.21	2.5	-0.01	0.37		0.25	TSI	Eurasia	3.55			3.02	1.98	3.11	3.15	0	1.98
MZIGUA	0.00011	48	6	YORUBA	Central West Africa NC	0.16	0	0.63	1.86	4.41	0.11	0.63		0.11	TSI	Eurasia	6.34		6.78	5.54	3.15	6.02	5.67	0	3.15
MAASAI	0.00018	26	4	YORUBA	Central West Africa NC	0.05	0	1.37	1.24	5.63	0.76	1.37		0.05	TSI	Eurasia	8.66		9.16	8.42	4.89	8.92	8.73	0	4.89
SUDANESE	1.6e-05	10	3	/GUI//GANA	Khoesan	0.42	0.1	0.69	0.53	3.42	0.35	0		0.1	GBR	Eurasia	5.33	5.53	5.66	4.46	2.56			0	2.56
GUMUZ	1.8e-05	7	1	SUDANESE	Nilo-Saharan	0.65	0.31	0.8	0	3.03	0.78	0.32		0.31	GBR	Eurasia	7.71	8.03			5.03	7.56	7.33	0	4.99
GUMUZ	7e-05	145	41	SUDANESE	Nilo-Saharan	-0.52	-0.91	0.21	0	1.99	1.08	-0.46		-0.91	PEL	Eurasia	9.39	9.92			5.41	9.06	9.04	0	8.86
ANUAK	3.4e-05	74	20	SUDANESE	Nilo-Saharan	1.33	1.3	1.56	0	1.26	1.72		0.71	0.35	JU/'HOANSI	Khoesan	1.06	1.05	1.12		0.78	1.37	0	1.27	0.35
AFAR	0.00032	60	13	SUDANESE	Nilo-Saharan	0.43	0.25	0.64	0	2.16	0.35	0.39		0.25	FIN	Eurasia	5.5	5.46			4.22	5.5	5.55	0	4.2
OROMO	0.00064	135	13	JU/'HOANSI	Khoesan	0.72	0.51	0.34	0.2	1.1	0.56	0		0.2	TSI	Eurasia	6.85	6.82	6.68	6.38	3.33	6.86		0	3.33
OROMO	5.4e-05	11	2	GUMUZ	Nilo-Saharan	-0.16	-0.29	0.05	0	0.55	-0.27	-0.85		-0.85	TSI	Eurasia	8.91	8.97	9.39		5.86	9.4	8.36	0	6.21
SOMALI	0.00036	92	18	AKANS	Central West Africa NC	0.35	0	0.75	0.36	2.4	0.24	0.73		0.24	TSI	Eurasia	4.74		4.93	4.91	3.55		4.65	0	3.39
WOLAYTA	0.00048	76	14	JU/'HOANSI	Khoesan	0.66	0.5	0.73	0.29	0.91	0.41	0		0.29	CEU	Eurasia	3.93		4.39	4.09	2.53	4.39		0	2.53
ARI	0.00045	152	17	JU/'HOANSI	Khoesan	0.72	0.59	0.83	0.56	3.33	0.54	0		0.54	TSI	Eurasia				3.33	2.07			0	2.07
AMHARA	0.00048	96	18	ANUAK	Nilo-Saharan	0.34	0.17	0.63	0	1.27	0.22	0.18		0.17	TSI	Eurasia	4.77	4.75	4.76		3.32	4.75		0	2.6
TIGRAY	0.00064	115	12	SUDANESE	Nilo-Saharan	0.55	0.38	0.75	0	2.55	0.41	0.32		0.32	TSI	Eurasia	7.49				5.15	7.76		0	5.01
MALAWI	3.7e-05	61	9	YORUBA	Central West Africa NC	0.36	0	0.7	1.36	1.22	1.1		0.5	0.36	JU/'HOANSI	Khoesan	4.92			4.37	3.87		0	2.75	2.75
SEBANTU
AMAXHOSA	0.00018	30	4	KASEM	Central West Africa NC	0.2	0	0.17	0.93	1.39	1.34		0.43	0.17	JU/'HOANSI	Khoesan	7.76		7.9	7.56	6.89		0	5.54	5.43
HERERO	0.00025	4	1	JU/'HOANSI	Khoesan	0.97	0.7	1.09	1.78	4.15	0.63	0		0.63	GBR	Eurasia	7.51	7.52	7.57	7.08	5.03	7.6		0	5.03
KHWE	0.00026	154	34	SEMI-BANTU	Central West Africa NC	0.82	0	0.15	1.06	1.55	0.46			0.15	PEL	Eurasia	2.08		2.14	1.68	1.06	2.22		0	0.72
KHWE	3.9e-05	25	7	YORUBA	Central West Africa NC	0.18	0	0.06	0.6	1.45	-0.3			-0.3	TSI	Eurasia	2.66		2.71	2.26	1.81	2.92		0	1.36
/GUI//GANA	3.7e-05	30	5	JOLA	West Africa NC	0	0.1	0.71	1.85	3.56	1.72			0.1	TSI	Eurasia		7.54	7.65	6.45	3.74	7.36		0	3.12
KARRETJIE	0.00046	7	1	BANTU	Central West Africa NC	0.59	0	0.7	1.92	5.71				0.59	GBR	Eurasia	16.31		16.32	15.31	11			0	11
NAMA	0.00029	8	1	MALAWI	South Africa NC	0.59	0.08	0.77	1.57	5.15	0			0.08	GBR	Eurasia	13.97		13.96	13.16	9.63			0	9.63
NAMA	0.00045	139	35	MALAWI	South Africa NC	1	0.02	1.2	-1.95	5.99	0			1.2	PEL	Eurasia	13.8		13.79	12.62	9.88			0	9.88
!XUN	0.0001	78	10	SEMI-BANTU	Central West Africa NC	0.13	0	0.32	1.33	2.59	0.02			0.02	TSI	Eurasia	5.37		5.9	4.81	2.25			0	2.17
KHOMANI	0.00048	8	1	BANTU	Central West Africa NC	0.55	0	0.93	1.56	5.3				0.55	GBR	Eurasia	15.25		15.26	15.03	10.47			0	10.47
JU/'HOANSI	0.0001	62	8	AMAXHOSA	South Africa NC	0.93	0.8	1.1	1.84	3.13	0			0.8	GBR	Eurasia	4.04	5.01	5	3.8	1.91			0	1.91
