# Supplementary material for: Admixture into and within sub-Saharan Africa
Source: eLife. 2016 Jun 21;5:e15266. doi: 10.7554/eLife.15266 (PMC4915815; doi:10.7554/eLife.15266)
Supplement: Figure 3—source data 3. — Columns as in Figure 3—source data 1. DOI: http://dx.doi.org/10.7554/eLife.15266.017 [file elife-15266-fig3-data3.xlsx]

## Sheet: Figure 3 - Source Data 3
Ethnic Group	amplitude	Date	Date(CI)	Pop1	Pop1Anc	Pop1Anc-West Africa NC(Z)	Pop1Anc-Central West Africa NC(Z)	Pop1Anc-East Africa NC (Z)	Pop1Anc-NiloSaharan (Z)	Pop1Anc-Afroasiatic (Z)	Pop1Anc-South Africa NC (Z)	Pop1Anc-Khoesan (Z)	Pop1Anc-Eurasia (Z)	Pop1Anc (Z)	Pop2	Pop2Anc	Pop2Anc-West Africa NC(Z)	Pop2Anc-Central West Africa NC(Z)	Pop2Anc-East Africa NC (Z)	Pop2Anc-NiloSaharan (Z)	Pop2Anc-Afroasiatic (Z)	Pop2Anc-South Africa NC (Z)	Pop2Anc-Khoesan (Z)	Pop2Anc-Eurasia (Z)	Pop2Anc (Z)
JOLA	7.1e-05	152	27	JU/'HOANSI	Khoesan	0.43	0.39	0.92	1.09	2.97	0.21	0		0.21	GBR	Eurasia	3.1			3.75	2.42			0	2.32
WOLLOF	0.00011	96	24	SEMI-BANTU	Central West Africa NC	0.03	0	0.62	0.93	3.18	0.29	0.41		0.03	GBR	Eurasia	5.84		5.77	5.13	3.16	5.72	5.59	0	3.16
WOLLOF	2.4e-05	11	3	YORUBA	Central West Africa NC	0.45	0	0.67	1.01	3.1	0.18	0.31		0.45	TSI	Eurasia	5.73		5.74	5.37	3.26	5.61	5.56	0	3.53
MANDINKAI
MANDINKAII	3.9e-05	20	3	SEMI-BANTU	Central West Africa NC	0.51	0	1.04	0.99	4.4	0.23	0.19		0.19	IBS	Eurasia	8.38		8.39	7.59	4.8	8.43	7.91	0	4.8
SEREHULE	6e-05	23	4	BANTU	Central West Africa NC	0.43	0	0.6	1.05	3.94	0.07	0.07		0.07	IBS	Eurasia	7.41		7.42	6.59	4.09	7.16	7.09	0	4.09
FULAI	0.00043	61	8	SEMI-BANTU	Central West Africa NC	0.09	0	1.27	1.27	5.42	0.4	0.63		0.09	GBR	Eurasia	11.76		11.65	10.62	6.64		11.74	0	6.43
FULAI	0.00016	11	2	AKANS	Central West Africa NC	-0.2	0	0.8	0.94	4.22	0.03	0.5		-0.2	IBS	Eurasia	8.82		8.76	8.02	5.19		8.8	0	5.19
MALINKE	0.00012	123	31	SEREHULE	West Africa NC	0	0.3	0.23	0.64	0.87	0.22	0.27		0.22	PEL	Eurasia		1.38	1.39		0.82	1.38	1.15	0	0.82
MALINKE	1.9e-05	8	2	MALAWI	South Africa NC	-0.52	-0.13	-0.4	0.13	0.84	0	-0.67		-0.13	TSI	Eurasia	2.03		1.97	1.91	1.25		1.29	0	1.25
SERERE	2.5e-05	15	3	BANTU	Central West Africa NC	0.68	0	0.75	1.02	4.58	0.41	0.25		0.25	GBR	Eurasia	7.98		8.1	7.1	4.32	8.07	7.58	0	4.32
MANJAGO	3.4e-05	3	1	YORUBA	Central West Africa NC	0.23	0	0.95	1.74	6.45	0.22	0.88		0.22	GBR	Eurasia	12.37		13.07	12.09	8.2	12.95	12.39	0	8.2
FULAII	2e-05	5	1	JU/'HOANSI	Khoesan	0.11	0.21	1.13	2.11	5.37	0.38	0		0.11	GBR	Eurasia	9.78	9.9	9.93	8.76	5.51			0	5.51
FULAII	7e-05	64	10	SEMI-BANTU	Central West Africa NC	0.1	0	0.73	1.68	5.01	0.13	-0.08		0.13	TSI	Eurasia	9.51		9.46	8.52	5.3	9.37	9.56	0	5.44
BAMBARA	5.2e-05	86	29	YORUBA	Central West Africa NC	0.06	0	0.18	0.35	0.97	0.09	0.33		0.06	IBS	Eurasia	1.7			1.58	0.99			0	0.99
BAMBARA	1.3e-05	9	2	/GUI//GANA	Khoesan	-0.2	-0.56	-0.33	-0.01	0.57	-0.36	0		-0.56	FIN	Eurasia					1.48	2.49		0	1.48
AKANS	2.3e-05	138	35	MANDINKAII	West Africa NC	0				0.26				0.26	GBR	Eurasia		1.98			0.58	1.76	0.48	0	0.48
MOSSI
YORUBA
KASEM
NAMKAM
SEMI-BANTU	1e-05	46	12	AKANS	Central West Africa NC	0.23	0		1.1		1			0.23	JU/'HOANSI	Khoesan	2.94			2.56			0		2.56
BANTU	2.1e-05	54	13	MOSSI	Central West Africa NC	0.01	0	0.41		0.54	1.79		2.07	0.01	JU/'HOANSI	Khoesan			2.94			0.84	0		0.84
LUHYA	7.8e-05	59	18	NAMKAM	Central West Africa NC	0.12	0		0.61	3.9	0.09	0.51		0.09	TSI	Eurasia	6.09			4.88	2.47		4.26	0	2.47
LUHYA	2.6e-05	13	3	YORUBA	Central West Africa NC	0.06	0		0.56	3.58	-0.14	0.77		0.06	TSI	Eurasia	5.84			4.42	2.27		4.5	0	2.27
KAMBE	0.00014	15	2	BANTU	Central West Africa NC	0.2	0		1.95	5.82	1.1	0.94		0.2	TSI	Eurasia	9.29			9.26	5.37	9.95	9.17	0	5.37
CHONYI	0.00014	27	2	YORUBA	Central West Africa NC	0.05	0		3.21	8.89	1.91	1.5		0.05	TSI	Eurasia	13.89			13.7	7.74		12.78	0	7.74
KAUMA	0.00015	27	2	SEMI-BANTU	Central West Africa NC	0.41	0		3.18	7.98		1.3		0.41	TSI	Eurasia	12.84			11.74	6.37		11.38	0	6.37
WASAMBAA	0.00012	21	3	NAMKAM	Central West Africa NC	0.21	0		2.46	6.63		1.56		0.21	TSI	Eurasia	8.67			8.16	3.97		7.87	0	3.97
GIRIAMA	0.00014	28	2	YORUBA	Central West Africa NC	0.58	0		3.89	8.81		2.05		0.58	TSI	Eurasia	12.38			11.97	6.15		11.8	0	6.15
WABONDEI	0.0001	23	2	NAMKAM	Central West Africa NC	0.36	0		3.78	9.03	1.59	2.31		0.36	TSI	Eurasia	12.37			11.6	5.91	13.21	10.54	0	5.91
MZIGUA	0.00011	32	4	YORUBA	Central West Africa NC	0.23	0		1.97	5.14	0.9	1.11		0.23	TSI	Eurasia	7.28			6.99	3.6	7.89	6.54	0	3.6
MAASAI	0.00039	81	17	SUDANESE	Nilo-Saharan	0.26	0.17		0	2.77	0.22	0.59		0.17	TSI	Eurasia	4.02	4.53			2.35	4.47	4.25	0	2.16
MAASAI	8.6e-05	11	2	SEMI-BANTU	Central West Africa NC	0.17	0		-0.23	2.85	0.12	0.43		0.12	TSI	Eurasia	4.24			4.52	2.38	4.52	4.28	0	2.38
SUDANESE	1.7e-05	6	2	/GUI//GANA	Khoesan	0.34	0.11	0.79	0.47	3.31	0.43	0		0.11	GBR	Eurasia	5.21	5.65	5.53	4.34	2.53	5.7		0	2.53
GUMUZ	1.8e-05	5	1	SUDANESE	Nilo-Saharan	0.5	0.25	0.64	0	2.23	0.59	0.24		0.24	GBR	Eurasia	5.58	5.84	5.82		3.68	5.45	5.31	0	3.55
GUMUZ	8.6e-05	104	26	SUDANESE	Nilo-Saharan	-0.55	-0.9	-0.07	0	1.22	-0.67	-0.99		-0.07	PEL	Eurasia	6.14	6.54	6.51		3.49	5.92	6.2	0	5.82
ANUAK	3.3e-05	52	16	SUDANESE	Nilo-Saharan	1.56	1.53	1.82	0	1.45	2.49		0.53	0.05	JU/'HOANSI	Khoesan	1.39	1.27	1.23		0.83	0.44	0	0.73	0.05
AFAR	0.00038	45	10	SUDANESE	Nilo-Saharan	0.23	0.09	0.54	0	2.01	0.17	0.37		0.09	TSI	Eurasia	4.84	4.8			3.63			0	3.57
OROMO	0.00063	86	9	JU/'HOANSI	Khoesan	0.75	0.52	0.76	0.22	2.19	0.6	0		0.22	TSI	Eurasia	7.99	7.99	8.01	7.48	4.39	8.01		0	4.39
OROMO	5e-05	7	2	JU/'HOANSI	Khoesan	0.75	0.64	0.76	0.86	2.19	0.65	0		0.86	TSI	Eurasia	8.02	8.14	8.03	7.48	4.39	8.01		0	6.19
SOMALI	0.00043	70	11	SUDANESE	Nilo-Saharan	0.3	0.12	0.93	0	2.6	0.15	0.31		0.12	TSI	Eurasia	5.26	5.54	5.48		3.83	5.52	5.28	0	3.75
WOLAYTA	0.00054	55	9	JU/'HOANSI	Khoesan	0.88	0.69	1	0.46	1.32	0.59	0		0.46	CEU	Eurasia	4.79	5.47	5.38	4.9	3.03	5.41		0	3.03
ARI	0.00045	99	11	JU/'HOANSI	Khoesan	0.83	0.67	1.03	0.63	3.2	0.59	0		0.59	TSI	Eurasia		5.17		4.34	2.73	5.15		0	2.73
AMHARA	0.00052	68	10	ANUAK	Nilo-Saharan	0.41	0.21	0.58	0	1.7	0.27	0.06		0.06	TSI	Eurasia	5.83	6.18	6.17		4.35	5.98		0	3.7
TIGRAY	0.00066	77	7	SUDANESE	Nilo-Saharan	0.65	0.44	0.86	0	2.83	0.47	0.44		0.44	TSI	Eurasia	9.02		8.98		6.29	8.86	8.73	0	6.27
MALAWI	4.1e-05	43	6	YORUBA	Central West Africa NC	0.42	0		1.53	1.34	1.12		0.51	0.42	JU/'HOANSI	Khoesan				5.5	4.79		0	3.15	3.15
SEBANTU
AMAXHOSA	5.2e-05	18	4	BAMBARA	West Africa NC	0	0.25		1.74	5.17	1.83			0.25	GBR	Eurasia		6.78		6.24	3.8			0	3.8
HERERO	0.00024	2	0	/GUI//GANA	Khoesan	1.06	0.64	1.29	2.36	6.25	0.58	0		0.58	GBR	Eurasia	12.56	12.59	12.65	11.8	8.44	12.7		0	8.44
KHWE	0.00019	103	22	WASAMBAA	East Africa NC	0.48	0.06	0	0.73	1.52				0.06	PEL	Eurasia	2.4	2.37		1.98	1.12			0	0.99
KHWE	4.4e-05	18	5	BANTU	Central West Africa NC	-0.04	0	0.09	0.48	1.04				-0.04	TSI	Eurasia	1.83		2.05	1.49	0.77			0	0.77
/GUI//GANA	3.8e-05	20	4	JOLA	West Africa NC	0	0.16		1.69	3.46	1.33			0.16	TSI	Eurasia		7.65		6.45	3.64			0	3.16
KARRETJIE	0.00047	5	0	BANTU	Central West Africa NC	0.76	0		2.33	6.97				0.76	GBR	Eurasia	19.78			19.45	13.76			0	13.76
NAMA	0.00027	5	0	MALAWI	South Africa NC	0.07	0.03	0.08	0.17	0.56	0			0.03	GBR	Eurasia	1.46	1.46	1.46	1.45	1.03			0	1.03
NAMA	0.00031	80	13	BANTU	Central West Africa NC	0.07	0	0.01	0.13	0.46	-0.01			0.07	FIN	Eurasia	1.24		1.24	1.22	0.95	1.24		0	1.03
!XUN	0.00011	52	6	BANTU	Central West Africa NC	0.37	0	0.58	1.89	3.84	0.08			0.08	TSI	Eurasia	7.06		7.61	6.26	3.51			0	3.16
KHOMANI	0.00049	6	0	BANTU	Central West Africa NC	0.73	0		2.1					0.73	GBR	Eurasia	20.41			20.13				0	20.13
JU/'HOANSI	8.6e-05	41	5	MALAWI	South Africa NC	0.15	0.15	0.5	1.51	3.6	0			0.15	TSI	Eurasia	6.13	6.68	6.68	5.56	2.96			0	2.96
