# Supplementary material for: Admixture into and within sub-Saharan Africa
Source: eLife. 2016 Jun 21;5:e15266. doi: 10.7554/eLife.15266 (PMC4915815; doi:10.7554/eLife.15266)
Supplement: Figure 3—source data 4. — Columns are as in Figure 3—source data 1. Here we show the results for the MALDER analysis where we over-ride any short-range LD and define a minimum distance of 0.5cM from which to start computing admixture LD curves DOI: http://dx.doi.org/10.7554/eLife.15266.018 [file elife-15266-fig3-data4.xlsx]

## Sheet: Figure 3 - Source Data 4
Ethnic Group	amplitude	Date	Date(CI)	Pop1	Pop1Anc	Pop1Anc-West Africa NC(Z)	Pop1Anc-Central West Africa NC(Z)	Pop1Anc-East Africa NC (Z)	Pop1Anc-NiloSaharan (Z)	Pop1Anc-Afroasiatic (Z)	Pop1Anc-South Africa NC (Z)	Pop1Anc-Khoesan (Z)	Pop1Anc-Eurasia (Z)	Pop1Anc (Z)	Pop2	Pop2Anc	Pop2Anc-West Africa NC(Z)	Pop2Anc-Central West Africa NC(Z)	Pop2Anc-East Africa NC (Z)	Pop2Anc-NiloSaharan (Z)	Pop2Anc-Afroasiatic (Z)	Pop2Anc-South Africa NC (Z)	Pop2Anc-Khoesan (Z)	Pop2Anc-Eurasia (Z)	Pop2Anc (Z)
JOLA	0.00016	225	24	MANDINKAI	West Africa NC	0	0.24	0.78	1.07	3.65	0.45	0.56		0.24	GBR	Eurasia		5.34	5.19	4.32	2.64	5.12	4.66	0	2.64
WOLLOF	0.00019	141	16	JOLA	West Africa NC	0	0.36	1.83	2.89	8.97	0.9	0.78		0.36	TSI	Eurasia		13.75	14.09	12.53	7.7	13.63	12.55	0	7.7
WOLLOF	2.9e-05	12	3	JOLA	West Africa NC	0	0.55	1.83	2.9	8.99	0.9	1.29		0.55	TSI	Eurasia		13.89	14.13	12.53	7.7	13.94	13.5	0	7.7
MANDINKAI	7.5e-05	31	10	JOLA	West Africa NC	0	0.25	0.82	1.09	3.11	0.51	0.62		0.25	TSI	Eurasia		4.36	4.59	4.62	2.71	4.4	4.39	0	2.71
MANDINKAII	0.00016	170	37	JOLA	West Africa NC	0	0.15	0.59	1.03	3.61	0.25	0.37		0.15	IBS	Eurasia		5.25	5.42	4.62	2.65	4.76	4.58	0	2.65
MANDINKAII	2.6e-05	14	5	JOLA	West Africa NC	0	0.32	0.92	1.14	3.75	0.3	0.45		0.32	CEU	Eurasia		5.37	5.41	4.59	2.59	5.29	4.55	0	2.59
SEREHULE	0.00018	116	19	JOLA	West Africa NC	0	0.28	1.03	1.96	6.12	0.5	0.83		0.28	TSI	Eurasia		9.7	9.95	8.98	5.73	9.64	9.42	0	5.73
SEREHULE	2.6e-05	10	3	AKANS	Central West Africa NC	0.02	0	0.91	1.73	6.58	0.11	0.55		0.11	IBS	Eurasia	10.78		12	10.65	6.76	10.87	10.86	0	6.76
FULAI	0.0006	86	9	JOLA	West Africa NC	0	0.47	2.57	3.61	13.21	0.98	2.25		0.47	TSI	Eurasia		25.91	25.75	23.18	14.98	24.99	24.12	0	14.98
FULAI	0.00019	12	2	AKANS	Central West Africa NC	-0.5	0	2.08	3.08	12.59	0.51	1.76		-0.5	IBS	Eurasia	25.07		25.02	22.44	14.5	24.28	23.53	0	14.5
MALINKE
SERERE
MANJAGO	3.3e-05	3	0	AKANS	Central West Africa NC	0.08	0	0.97	1.8	6.48	0.23	0.92		0.08	GBR	Eurasia	12.26		12.97	12	8.15	12.87	12.31	0	8.15
MANJAGO	0.00024	279	40	JU/'HOANSI	Khoesan	-1.13	-1.23	-0.25	0.73	5.76	-0.61	0		-1.13	TSI	Eurasia	12.86	13.37	13.41	12.78	9.42	12.92		0	9.42
FULAII	0.00013	106	11	AKANS	Central West Africa NC	0.04	0	1.03	1.6	6.88	0.4	0.92		0.04	TSI	Eurasia	10.92		12.61	10.98	6.87	11.57	11.18	0	6.71
FULAII	2.2e-05	6	1	JOLA	West Africa NC	0	-0.03	0.96	1.57	6.92	0.35	1.13		-0.03	GBR	Eurasia		10.7	11.25	11.07	6.48	10.75	10.04	0	6.48
BAMBARA	4.9e-05	37	11	AKANS	Central West Africa NC	0.33	0	0.5	0.81	2.7	0.13	0.21		0.13	TSI	Eurasia	3.76		4.81	4.12	2.52	4.45	4.41	0	2.52
AKANS	7.7e-05	174	38	JU/'HOANSI	Khoesan	0.64	0.41	0.76	1.05	2.01	0.35	0		0.35	IBS	Eurasia	1.59	1.43	1.96	2.08	0.95	2.13		0	0.95
MOSSI	7.3e-05	118	26	BANTU	Central West Africa NC	0.09	0	0.4	0.8	2.53	0.12	0.13		0.09	GBR	Eurasia	3.5		3.94	3.22	2.01	3.45	3.23	0	1.78
YORUBA	0.00013	257	42	/GUI//GANA	Khoesan	0.44	0.21	0.49	1.01	2.48	0.1	0		0.1	CEU	Eurasia	1.55	1.24	2.43	1.96	1.11	2.59		0	1.11
KASEM	0.00021	300	50	AMAXHOSA	South Africa NC	0.18	0.02	0.32	0.85	1.85	0	0.33		0.02	IBS	Eurasia	2.37	2.49	2.97	2.28	1.36		2.49	0	1.15
NAMKAM	0.00013	214	38	!XUN	Khoesan	0.22	0.11	0.48	0.62	2.14	0	0		0	TSI	Eurasia	3.11	3.05	3.22	2.77	1.47	3.33		0	1.47
SEMI-BANTU	0.0001	197	36	JU/'HOANSI	Khoesan	1.6	1.3	1.55	1.5		0.89	0		0.89	IBS	Eurasia	1.34	1.05	1.38	1.74	0.87	2.71		0	0.87
BANTU	0.00017	311	49	JU/'HOANSI	Khoesan	0.36	0.3	0.43			0.07	0		0.07	GBR	Eurasia	1.85	1.45	1.92	1.16	1.06	2.66		0	1.06
BANTU	2.1e-05	51	14	YORUBA	Central West Africa NC	0.57	0	0.27	0.15	0.14	1.39		-1.81	0.57	JU/'HOANSI	Khoesan	3.01		2.62	2.05	1.25	1.02	0	-1.42	1.88
LUHYA	0.00013	103	24	JU/'HOANSI	Khoesan	0.52	0.49	0.78	0.46	4.66	0.37	0		0.37	TSI	Eurasia	5.35	5.32	5.58	5.45	3.13	7.19		0	3.13
LUHYA	4.1e-05	16	3	MALAWI	South Africa NC	0.39	0.21	0.65	0.16	5.61	0	-0.06		0.21	TSI	Eurasia	10.24	9.26	11.2	9.63	5.17		9.85	0	5.33
KAMBE	0.00018	20	2	MALAWI	South Africa NC	0.98	0.32	0.88	3.69	9.41	0	1.23		0.32	TSI	Eurasia	14.36	14.3	15.34	13.51	8.35		14.33	0	8
CHONYI	0.00018	123	28	JU/'HOANSI	Khoesan	0.94	0.75	1.06	1.9	4.24	0.21	0		0.21	IBS	Eurasia	4.59	4.6	4.48	4.96	3.02	5.73		0	3.02
CHONYI	0.00012	23	2	MALAWI	South Africa NC	0.46	0.31	0.56	1.25	3.88	0	-0.58		0.31	TSI	Eurasia	5.64	5.49	6.72	5.52	3.3		5.63	0	3.51
KAUMA	0.00019	31	2	MALAWI	South Africa NC	1.52	0.67	1.28	5.87	14.76	0	1.75		0.67	TSI	Eurasia	21.44	21.18	23.06	19.97	12.1		21.42	0	11.46
WASAMBAA	0.00018	28	4	MALAWI	South Africa NC	1.08	0.5	0.95	3.7	8.45	0	1.54		0.5	TSI	Eurasia	11.02	10.81	12.27	10.1	5.83		10.99	0	5.33
GIRIAMA	0.00017	32	1	MALAWI	South Africa NC	2.33	0.78	2.11	9.54	22.8	0	3.41		0.78	TSI	Eurasia	31.59	31.09	34.24	29.08	17.33		31.4	0	16.28
WABONDEI	0.00016	33	3	MALAWI	South Africa NC	1.35	0.7	1.48	5.5	13.06	0	2.46		0.7	TSI	Eurasia	16.92	16.61	19.24	16.1	9.4		16.92	0	8.67
MZIGUA	0.00015	130	33	AMAXHOSA	South Africa NC	1.26	0.75	0.98	2.75	6.66	0	0.2		0.2	GBR	Eurasia	8.19	7.88	9.6	8.48	4.81		8.67	0	4.11
MZIGUA	8.8e-05	26	5	MALAWI	South Africa NC	0.5	0.24	0.71	1.54	4.32	0	-0.25		0.24	TSI	Eurasia	5.66	5.67	6.72	5.37	3.18		5.95	0	3.23
MAASAI	0.00053	104	9	SUDANESE	Nilo-Saharan	1.17	0.65	1.85	0	10.69	0.6	1.05		0.6	TSI	Eurasia	19.62	21.14	21.11		15.32	21.17	19.21	0	11.84
MAASAI	9.9e-05	11	2	MALAWI	South Africa NC	0.82	0.1	1.26	-0.6	9.6	0	0.42		0.1	TSI	Eurasia	18.61	18.96	20.17	19.72	11.3		18.97	0	10.88
SUDANESE
GUMUZ	1.9e-05	5	1	SUDANESE	Nilo-Saharan	0.61	0.33	0.68	0	2.65	0.68	0.3		0.3	GBR	Eurasia	6.71	6.96	6.95		5.24	7.21	6.25	0	4.16
GUMUZ	8.2e-05	110	25	SUDANESE	Nilo-Saharan	0.81	0.43	1.25	0	2.58	0.65	0.29		0.29	TSI	Eurasia	6.52	6.76	6.9		5.1	7	6.27	0	4.41
ANUAK
AFAR	0.001	166	31	ANUAK	Nilo-Saharan	0.59	0.37	0.64	0	2.55	0.44	0.56		0.37	TSI	Eurasia	6.03	6.28	6.4		5.12	6.33	6.2	0	4.15
AFAR	0.00013	21	6	SUDANESE	Nilo-Saharan	0.72	0.6	0.73	0	2.69	0.57	0.74		0.6	TSI	Eurasia	6.15	6.48	6.53		5.2	6.45	6.33	0	4.38
OROMO	0.00073	93	7	SUDANESE	Nilo-Saharan	1.58	1.05	2.14	0	7.99	1.1	0.42		0.42	TSI	Eurasia	22.22	22.84	23.25		18.51	22.96	22.13	0	15
OROMO	5.4e-05	7	2	JU/'HOANSI	Khoesan	1.44	0.96	1.77	1.51	7.87	1.05	0		1.51	TSI	Eurasia	22.98	24.38	24.89	23.06	15.63	24.84		0	15.63
SOMALI	0.00075	100	5	SUDANESE	Nilo-Saharan	1.15	0.87	1.6	0	7.53	0.9	1.25		0.87	TSI	Eurasia	17.28	17.76	18.06		18.06	17.82	17.45	0	11.67
WOLAYTA	0.00069	67	8	JU/'HOANSI	Khoesan	1.43	1.19	1.58	0.75	2.93	1	0		0.75	TSI	Eurasia	9.97	11	10.94	10.12	6.52	11.1		0	6.52
ARI	0.00056	109	7	JU/'HOANSI	Khoesan	2.39	2.07	2.77	1.91	9.13	1.87	0		1.87	TSI	Eurasia	12.67	14.16	14.05	12.6	7.83	14.34		0	7.83
AMHARA	0.00074	85	6	SUDANESE	Nilo-Saharan	0.89	0.59	1.23	0	5.02	0.69	0.29		0.29	TSI	Eurasia	14.33	14.91	15.11		12.28	14.96	14.57	0	9.77
TIGRAY	0.00082	87	7	SUDANESE	Nilo-Saharan	0.86	0.64	1.18	0	4.62	0.68	0.77		0.64	TSI	Eurasia	12.52	12.9	13.07		10.72	12.96	12.67	0	9.02
MALAWI	0.00021	355	81	/GUI//GANA	Khoesan	0.42	0.36	0.42	0.65	1.73	0.06	0		0.06	IBS	Eurasia	0.99	0.84	1	0.81	0.58	1.36		0	0.58
MALAWI	4e-05	41	6	YORUBA	Central West Africa NC	-0.08	0	0.06	-0.3	-0.37	0.53		-0.83	0.06	JU/'HOANSI	Khoesan	1.66		1.59	1.06	-0.01	0.49	0	-0.47	0.49
SEBANTU	0.00024	17	3	JU/'HOANSI	Khoesan	8.68	8.48	8.66	9.27	10.18	2.89	0		2.89	TSI	Eurasia	2.08	1.99	2.34	2.91	1.83	9.12		0	1.83
AMAXHOSA	0.00026	26	2	JU/'HOANSI	Khoesan	14.45	14.23	14.54	16.19	18.29	5.37	0		5.37	IBS	Eurasia	1.07	0.67	1.26	2.74	2.37	14.21		0	0.67
HERERO	0.00025	2	0	JU/'HOANSI	Khoesan	1.7	1.24	1.96	3.05	7.17	1.17	0		1.17	GBR	Eurasia	11.83	12.56	12.67	11.9	8.43	13.6		0	8.43
KHWE	0.00039	76	22	JU/'HOANSI	Khoesan	6.38	6.21	6.55	6.72	7.75	3.15	0		3.15	TSI	Eurasia	2.61	2.75	3.13	2.93	1.68	8.29		0	1.68
KHWE	0.0002	17	4	NAMKAM	Central West Africa NC	0.07	0	0.14	0.06	-1.06	1.97		-2.7	0.07	JU/'HOANSI	Khoesan	2.29		2.39	2.34	2.03	1.13	0	0.73	1.13
/GUI//GANA	0.0004	28	3	JU/'HOANSI	Khoesan	23.55	23	23.2	24.05	24.99	8.24	0		8.24	IBS	Eurasia	4.03	4.22	4.64	5.19	3.03	21.66		0	3.03
/GUI//GANA	0.00014	4	1	NAMKAM	Central West Africa NC	0.11	0	0.17	0.51	-1.21	8.82		-3.35	0.54	JU/'HOANSI	Khoesan	11.43		11.39	11.1	10.9	4.07	0	10.44	4.07
KARRETJIE	0.0011	5	0	JU/'HOANSI	Khoesan	14.37	13.73	14.43	15.56	18.63	11.44	0		11.44	GBR	Eurasia	15.47	18.14	18.14	15.87	10.22	24.23		0	10.22
NAMA	0.0005	5	0	JU/'HOANSI	Khoesan	6	5.6	6.16	6.74	9.17	2.97	0		2.97	GBR	Eurasia	9.48	10.56	10.71	9.78	6.79	10.4		0	6.79
NAMA	0.00079	60	5	JU/'HOANSI	Khoesan	6.13	5.72	6.48	6.98	9.34	3.04	0		3.04	TSI	Eurasia	9.25	10.38	10.64	9.57	6.47	10.21		0	6.47
!XUN	0.00047	49	5	JU/'HOANSI	Khoesan	15.44	14.86	15.6	16.79	18.79	7.67	0		7.67	TSI	Eurasia	4.92	5.33	6.25	5.66	2.9	19.07		0	2.9
!XUN	0.00013	10	1	MOSSI	Central West Africa NC	0.23	0	0.82	-0.12	-1.61	8.78		-2.87	0.23	JU/'HOANSI	Khoesan	10.14		10.37	10.14	9.62	4.91	0	7.78	4.91
KHOMANI	0.00094	5	1	JU/'HOANSI	Khoesan	4.8	4.52	4.84	5.27	6.81	1.9	0		1.9	GBR	Eurasia	6.96	8.06	8.03	7.1	4.74	9.79		0	4.74
KHOMANI	0.00051	49	13	JU/'HOANSI	Khoesan	6.12	5.75	6.14	6.45	7.77	1.93	0		1.93	TSI	Eurasia	6.81	7.94	7.96	6.94	4.53	9.75		0	4.53
JU/'HOANSI	0.00029	39	3	!XUN	Khoesan	11.56	11.12	11.64	12.76	14.32	2.67	0		2.67	TSI	Eurasia	7.98	9.92	10.17	7.52	3.67	15.73		0	3.67
