# Supplementary material for: Admixture into and within sub-Saharan Africa
Source: eLife. 2016 Jun 21;5:e15266. doi: 10.7554/eLife.15266 (PMC4915815; doi:10.7554/eLife.15266)
Supplement: Figure 4—source data 1. — Analysis refers to whether the main or masked analysis was used to produce the final result. Admixture P-values are based on 100 bootstrap replicates of the NULL procedure. Our resulting inference, res can be: 1D (two admixing sources at a single date); 1MW (multiple admixing sources at a single date); 2D (admixture at multiple dates); NA (no-admixture); U (uncertain). max(R1) refers to the R2 goodness-of-fit for a single date of admixture, taking the maximum value across all inferred coancestry curves. FQ1 is the fit of a single admixture event (i.e. the first principal component, reflecting admixture involving two sources) and FQ2 is the fit of the first two principal components capturing the admixture event(s) (the second component might be thought of as capturing a second, less strongly-signalled event. M is the additional R2 explained by adding a second date versus assuming only a single date of admixture; we use values above 0.35 to infer multiple dates (although see Supplementary Text for details). As well as the final result, for each event we show the inferred dates, αs and best matching sources for 1D, 1MW, and 2D inferences. Inferred dates are in years(+ 95% CI; B=BCE, otherwise CE); the proportion of admixture from the minority source (source 1) is represented by α. Date confidence intervals are based on 100 bootstrap replicates of the date inference DOI: http://dx.doi.org/10.7554/eLife.15266.027 [file elife-15266-fig4-data1.xlsx]

## Sheet: Figure 4 - Source Data 1
Ethnic Group	Analysis	P	result	max(R_1)	FQ_1	FQ_2	M	1Date	1Date aplha	src1	src2	1MW alpha	src3	src4	2Date 1	2Date 1 alpha	src1	src2	2Date 2	2Date 2 alpha	src3	src4
SEREHULE	main	$<$0.01	1D	0.943	1	1	0.36	413(514B-921)	0.11	GBR	JOLA
MANDINKAII	main	$<$0.01	1D	0.925	1	1	0.39	51B(1244B-1066)	0.1	GBR	JOLA
WOLLOF	main	$<$0.01	1D	0.938	1	1	0.63	254B(779B-355)	0.09	GBR	JOLA
MANDINKAI	main	$<$0.01	1D	0.806	1	1	0.47	312B(718B-416)	0.15	GBR	JOLA
SERERE	main	$<$0.01	1D	0.885	1	1	0.41	776B(1740B-254)	0.08	GBR	JOLA
FULAI	main	$<$0.01	1D	0.969	1	1	0.82	239(199B-486)	0.19	IBS	WOLLOF
BAMBARA	main	$<$0.01	1D	0.901	1	1	0.36	152(675B-906)	0.06	CEU	MALINKE
FULAII	main	$<$0.01	1D	0.939	1	1	0.57	65(253B-876)	0.1	GBR	MALINKE
MANJAGO	main	$<$0.01	1D	0.779	0.985	1	0.5	413(1590B-1718)	0.21	FULAI	JOLA
JOLA	main	$<$0.01	1D	0.642	1	1	0.08	834B(2287B-169)	0.17	FULAI	SERERE
MALINKE	main	$<$0.01	1D	0.91	1	1	0.5	326(544B-865)	0.11	GBR	BAMBARA
YORUBA	main	$<$0.01	1D	0.465	0.999	1	0.03	848(338-1184)	0.48	SEMI-BANTU	AKANS
KASEM	main	$<$0.01	1D	0.305	0.997	1	0.03	819(456-1329)	0.1	SEMI-BANTU	MOSSI
NAMKAM	main	$<$0.01	1D	0.197	0.996	0.999	0.02	616(184B-1197)	0.11	SEMI-BANTU	MOSSI
SEMI-BANTU	main	$<$0.01	1D	0.43	0.999	1	0.03	674(192-1126)	0.2	MZIGUA	YORUBA
BANTU	main	$<$0.01	1D	0.447	0.995	0.999	0.05	7(617B-602)	0.34	MALAWI	YORUBA
MOSSI	main	$<$0.01	1D	0.41	0.997	1	0.05	355(97B-952)	0.21	YORUBA	KASEM
AKANS	main	$<$0.01	1MW	0.623	0.791	0.999	0.14	1399(717-1675)	0.03	MALAWI	KASEM	0.29	KASEM	NAMKAM
MAASAI	main	$<$0.01	2D	0.918	0.992	1	0.61								1660(1573-1747)	0.06	TIGRAY	LUHYA	254B(764B-239)	0.35	AFAR	LUHYA
CHONYI	main	$<$0.01	1D	0.989	0.981	1	0.18	1138(1080-1182)	0.08	KHV	WASAMBAA
MZIGUA	main	$<$0.01	1D	0.988	0.999	1	0.19	1080(1007-1138)	0.11	AFAR	WABONDEI
KAMBE	main	$<$0.01	2D	0.989	0.987	1	0.46								1544(1370-1776)	0.14	KAUMA	MZIGUA	761(461B-1053)	0.06	GBR	MZIGUA
WABONDEI	main	$<$0.01	2D	0.985	0.998	0.999	0.48								1573(1326-1834)	0.28	WASAMBAA	MZIGUA	703(19-936)	0.1	TIGRAY	MZIGUA
LUHYA	main	$<$0.01	2D	0.993	0.998	0.999	0.59								1486(1428-1573)	0.25	SUDANESE	MZIGUA	65(400B-616)	0.29	WASAMBAA	MZIGUA
GIRIAMA	main	$<$0.01	1D	0.989	0.999	1	0.21	1196(1138-1254)	0.1	OROMO	MZIGUA
WASAMBAA	main	$<$0.01	1D	0.988	1	1	0.34	1312(1254-1341)	0.14	TIGRAY	MZIGUA
KAUMA	main	$<$0.01	1D	0.992	0.982	1	0.29	1225(1167-1254)	0.06	GIH	MZIGUA
MALAWI	main.null	$<$0.01	1MW	0.894	0.967	0.997	0.12	471(340-631)	0.17	SEMI-BANTU	MZIGUA	0.16	AMAXHOSA	MZIGUA
ANUAK	main	$<$0.01	1MW	0.575	0.961	0.997	0.04	703(427-1037)	0.17	YORUBA	SUDANESE	0.33	SUDANESE	SUDANESE
ARI	main.null	$<$0.01	1D	0.866	0.995	0.999	0.06	689B(965B-297B)	0.14	TSI	GUMUZ
SUDANESE	main	$<$0.01	1MW	0.789	0.782	0.999	0.21	1341(1225-1660)	0.27	GUMUZ	ANUAK	0.25	ANUAK	ANUAK
GUMUZ	main	$<$0.01	1D	0.785	0.987	0.999	0.26	1544(1384-1718)	0.24	ARI	ANUAK
AFAR	main.null	$<$0.01	1D	0.895	1	1	0.14	326(7-587)	0.23	TSI	SOMALI
OROMO	main.null	$<$0.01	2D	0.922	1	1	0.5								1834(1674-1892)	0.17	IBS	WOLAYTA	283B(617B-51B)	0.27	TSI	ARI
SOMALI	main.null	$<$0.01	2D	0.939	1	1	0.4								1573(876-1805)	0.04	TSI	WOLAYTA	863B(1887B-399B)	0.47	TIGRAY	GUMUZ
WOLAYTA	main.null	$<$0.01	1D	0.825	1	1	0.18	268(8B-602)	0.22	TSI	ARI
TIGRAY	main.null	$<$0.01	1D	0.947	1	1	0.2	36(196B-240)	0.35	TSI	ARI
AMHARA	main.null	$<$0.01	1D	0.947	1	1	0.26	138B(385B-95)	0.35	TSI	ARI
AMAXHOSA	main.null	$<$0.01	1D	0.982	1	1	0.49	1196(1109-1283)	0.32	KARRETJIE	MALAWI
SEBANTU	main.null	$<$0.01	1D	0.982	1	1	0.57	1109(1051-1196)	0.3	KARRETJIE	MALAWI
HERERO	main.null	$<$0.01	2D	0.816	0.998	1	0.34								1834(1805-1892)	0.24	NAMA	AMAXHOSA	674(124B-979)	0.44	NAMA	SEMI-BANTU
KARRETJIE	main.null	$<$0.01	1D	0.997	0.999	1	0.33	1776(1776-1805)	0.1	GBR	/GUI//GANA
JU/'HOANSI	main.null	$<$0.01	1D	0.832	0.986	1	0.08	558(311-851)	0.11	SOMALI	KARRETJIE
KHOMANI	main.null	$<$0.01	1D	0.998	0.999	1	0.09	1776(1747-1805)	0.13	CEU	KARRETJIE
/GUI//GANA	main.null	$<$0.01	1D	0.865	0.995	1	0.33	1544(1457-1631)	0.24	MALAWI	JU/'HOANSI
NAMA	main.null	$<$0.01	1MW	0.991	0.93	0.999	0.52	1805(1805-1863)	0.12	CEU	JU/'HOANSI	0.23	HERERO	KHOMANI
!XUN	main.null	$<$0.01	1D	0.951	0.999	1	0.21	1312(1254-1385)	0.28	SEMI-BANTU	JU/'HOANSI
KHWE	main.null	$<$0.01	1D	0.911	0.985	0.999	0.16	1312(1152-1399)	0.4	JU/'HOANSI	SEMI-BANTU
