# Supplementary material for: Admixture into and within sub-Saharan Africa
Source: eLife. 2016 Jun 21;5:e15266. doi: 10.7554/eLife.15266 (PMC4915815; doi:10.7554/eLife.15266)
Supplement: Figure 4—source data 2. — Analysis refers to whether the main or masked analysis was used to produce the final result. Admixture P-values are based on 100 bootstrap replicates of the NULL procedure. Our resulting inference, res can be: 1D (two admixing sources at a single date); 1MW (multiple admixing sources at a single date); 2D (admixture at multiple dates); NA (no-admixture); U (uncertain). max(R1) refers to the R2 goodness-of-fit for a single date of admixture, taking the maximum value across all inferred coancestry curves. FQ1 is the fit of a single admixture event (i.e. the first principal component, reflecting admixture involving two sources) and FQ2 is the fit of the first two principal components capturing the admixture event(s) (the second component might be thought of as capturing a second, less strongly-signalled event. M is the additional R2 explained by adding a second date versus assuming only a single date of admixture; we use values above 0.35 to infer multiple dates (although see Supplementary Text for details). As well as the final result, for each event we show the inferred dates, αs and best matching sources for 1D, 1MW, and 2D inferences. Inferred dates are in years(+ 95% CI; B=BCE, otherwise CE); the proportion of admixture from the minority source (source 1) is represented by α. Date confidence intervals are based on 100 bootstrap replicates of the date inference DOI: http://dx.doi.org/10.7554/eLife.15266.028 [file elife-15266-fig4-data2.xlsx]

## Sheet: Figure 4 - Source Data 2
Ethnic Group	Analysis	P	result	max(R_1)	FQ_1	FQ_2	M	1Date	1Date aplha	src1	src2	1MW alpha	src3	src4	2Date 1	2Date 1 alpha	src1	src2	2Date 2	2Date 2 alpha	src3	src4
AFAR	main	$<$0.01	1D	0.935	1	1	0.23	558(253-820)	0.22	TSI	SOMALI	0.43	AMHARA	OROMO	1196(993-1892)	0.16	TSI	WOLAYTA	1443B(2284B-428)	0.29	TSI	ARI
AFAR	main.null	$<$0.01	1D	0.895	1	1	0.14	326(7-587)	0.23	TSI	SOMALI	0.37	OROMO	AMHARA	1167(1007-1892)	0.14	TSI	WOLAYTA	1530B(2183B-413)	0.31	TSI	ARI
AKANS	main	$<$0.01	1MW	0.623	0.791	0.999	0.14	1399(717-1675)	0.03	MALAWI	KASEM	0.29	KASEM	NAMKAM	1805(1645-1892)	0.26	MOSSI	NAMKAM	384(1791B-1255)	0.04	MALAWI	KASEM
AKANS	main.null	$<$0.01	1D	0.253	0.996	0.998	0.06	935(66B-1545)	0.04	MALAWI	KASEM	0.1	MOSSI	NAMKAM	1805(1572-1892)	0.06	SEMI-BANTU	NAMKAM	283B(3744B-1040)	0.06	MZIGUA	MOSSI
AMAXHOSA	main	$<$0.01	1D(2D)	0.986	1	1	0.43	1225(1167-1283)	0.31	KARRETJIE	MALAWI	0.34	SEBANTU	SEBANTU	1312(1239-1892)	0.3	KARRETJIE	MALAWI	4111B(6092B-1080)	0.32	KARRETJIE	MALAWI
AMAXHOSA	main.null	$<$0.01	1D(2D)	0.982	1	1	0.49	1196(1109-1283)	0.32	KARRETJIE	MALAWI	0.32	SEBANTU	SEBANTU	1312(1225-1617)	0.31	KARRETJIE	MALAWI	2458B(4187B-646)	0.32	KARRETJIE	MALAWI
AMHARA	main	$<$0.01	2D	0.954	1	1	0.39	7(196B-167)	0.35	TSI	ARI	0.25	TIGRAY	AFAR	1573(1121-1791)	0.23	TSI	OROMO	631B(1299B-370B)	0.36	TSI	ARI
AMHARA	main.null	$<$0.01	1D	0.947	1	1	0.26	138B(385B-95)	0.35	TSI	ARI	0.3	TIGRAY	TIGRAY	1631(1079-1892)	0.21	TSI	OROMO	602B(1081B-312B)	0.37	TSI	ARI
ANUAK	main	$<$0.01	1MW	0.575	0.961	0.997	0.04	703(427-1037)	0.17	YORUBA	SUDANESE	0.33	SUDANESE	SUDANESE	1892(1137-1892)	0.18	GUMUZ	SUDANESE	471(271B-964)	0.16	YORUBA	SUDANESE
ANUAK	main.null	$<$0.01	1MW	0.449	0.962	0.996	0.05	587(311-1109)	0.14	YORUBA	SUDANESE	0.25	GUMUZ	SUDANESE	1225(1109-1892)	0.33	SUDANESE	SUDANESE	297(516B-1037)	0.14	YORUBA	SUDANESE
ARI	main	$<$0.01	1D	0.885	0.994	0.999	0.08	602B(965B-283B)	0.15	TSI	GUMUZ	0.24	WOLAYTA	SOMALI	1399(1108-1892)	0.23	WOLAYTA	MAASAI	1124B(1501B-485B)	0.1	TSI	GUMUZ
ARI	main.null	$<$0.01	1D	0.866	0.995	0.999	0.06	689B(965B-297B)	0.14	TSI	GUMUZ	0.21	WOLAYTA	SOMALI	1312(1138-1892)	0.46	SOMALI	GUMUZ	1327B(1866B-440B)	0.11	TSI	GUMUZ
BAMBARA	main	$<$0.01	1D(2D)	0.901	1	1	0.36	1370(1181-1501)	0.11	GBR	MALINKE	0.3	SERERE	MALINKE	1747(1631-1892)	0.21	FULAI	MALINKE	152(675B-906)	0.06	CEU	MALINKE
BAMBARA	main.null	$<$0.01	1D	0.897	1	1	0.31	1341(1167-1457)	0.1	GBR	MALINKE	0.22	SERERE	MALINKE	1718(1529-1892)	0.2	FULAI	MALINKE	51B(1473B-819)	0.06	CEU	MALINKE
BANTU	main	$<$0.01	1D	0.447	0.995	0.999	0.05	7(617B-602)	0.34	MALAWI	YORUBA	0.31	MALAWI	MALAWI	1776(1295-1892)	0.43	MZIGUA	MALAWI	109B(718B-503)	0.36	MALAWI	YORUBA
BANTU	main.null	$<$0.01	1D	0.588	0.998	1	0.02	747B(1257B-311B)	0.5	MALAWI	YORUBA	0.29	MALAWI	MALAWI	1283(1239-1892)	0.36	MZIGUA	MALAWI	312B(1098B-66)	0.48	MALAWI	YORUBA
CHONYI	main	$<$0.01	1D	0.989	0.981	1	0.18	1138(1080-1182)	0.08	KHV	WASAMBAA	0.24	LUHYA	MALAWI	1254(1167-1733)	0.2	MALAWI	WASAMBAA	1356B(3259B-950)	0.08	KHV	MZIGUA
CHONYI	main.null	$<$0.01	1D	0.988	0.975	1	0.24	1109(1022-1138)	0.07	CDX	GIRIAMA	0.3	LUHYA	MALAWI	1283(1167-1632)	0.13	CDX	WASAMBAA	254B(1827B-848)	0.06	KHV	MZIGUA
FULAI	main	$<$0.01	1D(2D)	0.969	1	1	0.82	239(199B-486)	0.19	IBS	WOLLOF	0.44	WOLLOF	WOLLOF	1660(1544-1747)	0.46	BAMBARA	IBS	1225newline(1109-1254)	0.23	IBS	SEREHULE
FULAI	main.null	$<$0.01	1D(2D)	0.966	1	1	0.82	297(7-558)	0.2	IBS	WOLLOF	0.4	WOLLOF	WOLLOF	1689(1602-1791)	0.42	BAMBARA	WOLLOF	1196newline(1138-1254)	0.24	IBS	SEREHULE
FULAII	main	$<$0.01	1D(2D)	0.939	1	1	0.57	1399(1312-1472)	0.13	GBR	MALINKE	0.39	SERERE	BAMBARA	1660(1602-1834)	0.23	FULAI	MALINKE	65(253B-876)	0.1	GBR	MALINKE
FULAII	main.null	$<$0.01	1D(2D)	0.939	1	1	0.56	1399(1283-1457)	0.13	GBR	MALINKE	0.14	SERERE	MALINKE	1660(1602-1834)	0.23	FULAI	MALINKE	51B(472B-906)	0.11	GBR	MALINKE
GIRIAMA	main	$<$0.01	1D	0.989	0.999	1	0.21	1196(1138-1254)	0.1	OROMO	MZIGUA	0.18	SEMI-BANTU	MALAWI	1370(1225-1685)	0.21	WASAMBAA	MZIGUA	210(2679B-964)	0.1	OROMO	MZIGUA
GIRIAMA	main.null	$<$0.01	1D	0.989	1	1	0.28	1196(1109-1240)	0.11	OROMO	MZIGUA	0.2	SEMI-BANTU	MALAWI	1399(1268-1660)	0.19	WASAMBAA	MZIGUA	22B(1667B-819)	0.09	OROMO	MZIGUA
/GUI//GANA	main	$<$0.01	1D(2D)	0.904	0.995	1	0.4	1544(1428-1631)	0.25	MALAWI	KARRETJIE	0.15	KHWE	AMAXHOSA	1747(1544-1892)	0.2	MALAWI	JU/'HOANSI	877(286B-1196)	0.28	KHWE	KARRETJIE
/GUI//GANA	main.null	$<$0.01	1D	0.865	0.995	1	0.33	1544(1457-1631)	0.24	MALAWI	JU/'HOANSI	0.12	KHWE	AMAXHOSA	1834(1660-1892)	0.19	MALAWI	JU/'HOANSI	935(383-1196)	0.27	MALAWI	KARRETJIE
GUMUZ	main	$<$0.01	1D	0.785	0.987	0.999	0.26	1544(1384-1718)	0.24	ARI	ANUAK	0.42	ANUAK	ANUAK	1747(1631-1892)	0.27	ARI	ANUAK	1385B(3694B-1358)	0.21	WOLAYTA	ANUAK
GUMUZ	main.null	$<$0.01	1MW	0.748	0.974	0.996	0.14	1573(1428-1747)	0.19	ARI	ANUAK	0.46	ANUAK	ANUAK	1718(1631-1892)	0.22	ARI	ANUAK	1124B(3500B-1544)	0.29	WOLAYTA	ANUAK
JOLA	main	$<$0.01	1D	0.642	1	1	0.08	225B(1067B-1791)	0.18	FULAI	SERERE	0.49	MANDINKAI	MALINKE	1892(1790-1892)	0.44	MANJAGO	WOLLOF	834B(2287B-169)	0.17	FULAI	SERERE
JOLA	main.null	$<$0.01	1D	0.652	1	1	0.04	1907B(3204B-674B)	0.11	GBR	SERERE	0.47	MANDINKAI	FULAII	1834(1469-1892)	0.37	SERERE	WOLLOF	2487B(3044B-34B)	0.09	GBR	SERERE
JU/'HOANSI	main	$<$0.01	1MW	0.866	0.974	0.998	0.1	732(616-993)	0.15	SOMALI	KARRETJIE	0.33	NAMA	KARRETJIE	1892(1616-1892)	0.26	NAMA	KARRETJIE	587(311-805)	0.16	SOMALI	KARRETJIE
JU/'HOANSI	main.null	$<$0.01	1D	0.832	0.986	1	0.08	558(311-851)	0.11	SOMALI	KARRETJIE	0.48	!XUN	KARRETJIE	1805(1108-1892)	0.15	KARRETJIE	!XUN	413(586B-761)	0.13	SOMALI	KARRETJIE
KAMBE	main	$<$0.01	2D	0.989	0.987	1	0.46	1283(1254-1399)	0.07	GBR	MZIGUA	0.34	LUHYA	MALAWI	1544(1370-1776)	0.14	KAUMA	MZIGUA	761(461B-1053)	0.06	GBR	MZIGUA
KAMBE	main.null	$<$0.01	2D	0.988	0.986	1	0.49	1225(1210-1370)	0.07	GBR	MZIGUA	0.32	LUHYA	MALAWI	1602(1457-1776)	0.16	KAUMA	MZIGUA	790(296-1022)	0.06	GBR	MZIGUA
KARRETJIE	main	$<$0.01	1D(2D)	0.998	0.999	1	0.38	1776(1747-1805)	0.1	GBR	/GUI//GANA	0.19	CDX	#NAME?	1805(1747-1878)	0.1	GBR	/GUI//GANA	1602(1123-1776)	0.15	AMAXHOSA	KHOMANI
KARRETJIE	main.null	$<$0.01	1D	0.997	0.999	1	0.33	1776(1776-1805)	0.1	GBR	/GUI//GANA	0.21	CDX	#NAME?	1805(1747-1892)	0.09	GBR	/GUI//GANA	1660(1092-1776)	0.37	AMAXHOSA	KHOMANI
KASEM	main	$<$0.01	1D	0.305	0.997	1	0.03	819(456-1329)	0.1	SEMI-BANTU	MOSSI	0.37	MOSSI	NAMKAM	1892(1282-1892)	0.45	MOSSI	MOSSI	790(10518B-1414)	0.07	SEMI-BANTU	MOSSI
KASEM	main.null	$<$0.01	1D	0.278	0.997	1	0.02	645(87B-1138)	0.16	YORUBA	MOSSI	0.37	MOSSI	NAMKAM	1399(1138-1892)	0.45	AKANS	MOSSI	616(6103B-1312)	0.06	MALAWI	MOSSI
KAUMA	main	$<$0.01	1D	0.992	0.982	1	0.29	1225(1167-1254)	0.06	GIH	MZIGUA	0.42	LUHYA	MALAWI	1515(1341-1878)	0.2	KAMBE	MZIGUA	674(138B-1080)	0.07	GIH	MZIGUA
KAUMA	main.null	$<$0.01	1D	0.991	0.986	1	0.31	1196(1167-1254)	0.08	GIH	MZIGUA	0.44	WASAMBAA	MALAWI	1573(1370-1834)	0.17	KAMBE	MZIGUA	761(166-1022)	0.08	GIH	MZIGUA
KHOMANI	main	$<$0.01	1D	0.998	0.999	1	0.18	1776(1747-1805)	0.13	CEU	KARRETJIE	0.27	HERERO	KARRETJIE	1776(1747-1820)	0.13	CEU	KARRETJIE	312B(356B-1762)	0.19	WOLAYTA	KARRETJIE
KHOMANI	main.null	$<$0.01	1D	0.998	0.999	1	0.09	1776(1747-1805)	0.13	CEU	KARRETJIE	0.27	HERERO	KARRETJIE	1776(1747-1892)	0.13	CEU	KARRETJIE	1472B(1142B-1776)	0.21	IBS	KARRETJIE
KHWE	main	$<$0.01	1D	0.928	0.981	0.998	0.21	1341(1225-1428)	0.41	/GUI//GANA	SEMI-BANTU	0.28	MZIGUA	SEBANTU	1486(1370-1675)	0.43	/GUI//GANA	SEMI-BANTU	457B(2490B-703)	0.45	/GUI//GANA	SEMI-BANTU
KHWE	main.null	$<$0.01	1D	0.911	0.985	0.999	0.16	1312(1152-1399)	0.4	JU/'HOANSI	SEMI-BANTU	0.27	MZIGUA	SEBANTU	1573(1370-1820)	0.43	!XUN	MALAWI	268(2009B-979)	0.42	/GUI//GANA	SEMI-BANTU
LUHYA	main	$<$0.01	2D	0.993	0.998	0.999	0.59	1370(1341-1428)	0.28	SUDANESE	MZIGUA	0.46	WASAMBAA	MZIGUA	1486(1428-1573)	0.25	SUDANESE	MZIGUA	65(400B-616)	0.29	WASAMBAA	MZIGUA
LUHYA	main.null	$<$0.01	2D	0.991	0.998	0.999	0.59	1341(1341-1399)	0.29	SUDANESE	MZIGUA	0.44	WASAMBAA	MZIGUA	1486(1442-1544)	0.25	SUDANESE	MZIGUA	123(313B-486)	0.26	ANUAK	MZIGUA
MALAWI	main	$<$0.01	1MW	0.895	0.929	0.992	0.08	587(413-761)	0.21	SEMI-BANTU	MZIGUA	0.16	SEBANTU	MZIGUA	1225(703-1892)	0.41	MZIGUA	MZIGUA	167B(2506B-500)	0.14	YORUBA	MZIGUA
MALAWI	main.null	$<$0.01	1MW	0.894	0.967	0.997	0.12	471(340-631)	0.17	SEMI-BANTU	MZIGUA	0.16	AMAXHOSA	MZIGUA	1863(1297-1892)	0.38	MZIGUA	MZIGUA	355(21-457)	0.18	SEMI-BANTU	MZIGUA
MALINKE	main	$<$0.01	1D(2D)	0.91	1	1	0.5	1457(1384-1602)	0.14	GBR	BAMBARA	0.31	SERERE	BAMBARA	1718(1674-1834)	0.24	FULAI	FULAII	326(544B-865)	0.11	GBR	BAMBARA
MALINKE	main.null	$<$0.01	1D(2D)	0.916	1	1	0.43	1370(1355-1602)	0.12	GBR	BAMBARA	0.39	JOLA	BAMBARA	1718(1645-1834)	0.23	FULAI	BAMBARA	355(591B-747)	0.08	GBR	BAMBARA
MANDINKAI	main	$<$0.01	1D(2D)	0.806	1	1	0.47	1573(1399-1689)	0.16	FULAI	JOLA	0.44	JOLA	SEREHULE	1805(1747-1878)	0.19	FULAI	JOLA	312B(718B-416)	0.15	GBR	JOLA
MANDINKAI	main.null	$<$0.01	1D(2D)	0.796	1	1	0.42	1544(1355-1675)	0.16	FULAI	JOLA	0.49	SEREHULE	JOLA	1805(1747-1863)	0.19	FULAI	JOLA	428B(690B-256)	0.15	GBR	JOLA
MANDINKAII	main	$<$0.01	1D(2D)	0.925	1	1	0.39	1225(1123-1341)	0.14	GBR	JOLA	0.3	JOLA	MALINKE	1631(1486-1892)	0.2	FULAI	JOLA	51B(1244B-1066)	0.1	GBR	JOLA
MANDINKAII	main.null	$<$0.01	1D(2D)	0.923	1	1	0.38	1196(1051-1327)	0.19	FULAI	JOLA	0.43	JOLA	FULAII	1573(1500-1892)	0.24	FULAI	JOLA	109B(843B-1138)	0.17	GBR	JOLA
MANJAGO	main	$<$0.01	1D(2D)	0.779	0.985	1	0.5	1747(1718-1834)	0.18	FULAI	JOLA	0.39	SERERE	SEREHULE	1892(1790-1892)	0.23	FULAI	JOLA	413(1590B-1718)	0.21	FULAI	JOLA
MANJAGO	main.null	$<$0.01	1D(2D)	0.766	0.989	1	0.48	1776(1718-1863)	0.19	FULAI	JOLA	0.38	SERERE	WOLLOF	1892(1805-1892)	0.17	FULAI	JOLA	326(880B-1660)	0.2	FULAI	SERERE
MAASAI	main	$<$0.01	2D	0.918	0.992	1	0.61	1312(1225-1486)	0.49	LUHYA	SOMALI	0.27	WABONDEI	LUHYA	1660(1573-1747)	0.06	TIGRAY	LUHYA	254B(764B-239)	0.35	AFAR	LUHYA
MAASAI	main.null	$<$0.01	2D	0.911	0.992	1	0.56	1254(1123-1443)	0.49	SOMALI	LUHYA	0.27	WABONDEI	LUHYA	1631(1515-1747)	0.06	TIGRAY	LUHYA	109B(603B-297)	0.37	SOMALI	LUHYA
MOSSI	main	$<$0.01	1D	0.41	0.997	1	0.05	355(97B-952)	0.21	YORUBA	KASEM	0.2	AKANS	KASEM	1892(1485-1892)	0.27	KASEM	KASEM	442(840B-979)	0.15	SEMI-BANTU	KASEM
MOSSI	main.null	$<$0.01	1D	0.417	0.998	1	0.04	65(443B-573)	0.28	YORUBA	BAMBARA	0.18	NAMKAM	KASEM	1892(1399-1892)	0.24	KASEM	KASEM	181(501B-776)	0.2	SEMI-BANTU	KASEM
MZIGUA	main	$<$0.01	1D	0.988	0.999	1	0.19	1080(1007-1138)	0.11	AFAR	WABONDEI	0.32	LUHYA	MALAWI	1196(1109-1733)	0.13	WASAMBAA	WABONDEI	370B(1156B-993)	0.12	WASAMBAA	WABONDEI
MZIGUA	main.null	$<$0.01	1D	0.986	0.999	1	0.18	1022(935-1095)	0.09	AFAR	WABONDEI	0.23	SEMI-BANTU	MALAWI	1341(1108-1791)	0.17	WASAMBAA	WABONDEI	268(385B-863)	0.1	AFAR	WABONDEI
NAMA	main	$<$0.01	1D(2D)	0.992	0.982	1	0.7	1805(1805-1834)	0.3	HERERO	KHOMANI	0.21	CEU	JU/'HOANSI	1834(1834-1863)	0.31	HERERO	KHOMANI	210(152-935)	0.15	HERERO	KHOMANI
NAMA	main.null	$<$0.01	1MW(2D)	0.991	0.93	0.999	0.52	1805(1805-1863)	0.12	CEU	JU/'HOANSI	0.23	HERERO	#NAME?	1834(1819-1892)	0.11	CEU	JU/'HOANSI	573B(428B-1153)	0.29	GBR	KARRETJIE
NAMKAM	main	$<$0.01	1D	0.197	0.996	0.999	0.02	616(184B-1197)	0.11	SEMI-BANTU	MOSSI	0.15	MOSSI	KASEM	1892(973-1892)	0.4	AKANS	MOSSI	268(1458B-1196)	0.12	SEMI-BANTU	MOSSI
NAMKAM	main.null	$<$0.01	1D	0.18	0.999	1	0.03	123(1243B-1037)	0.17	SEMI-BANTU	MOSSI	0.2	MOSSI	KASEM	1892(920-1892)	0.17	YORUBA	MOSSI	515B(2417B-820)	0.28	YORUBA	MOSSI
OROMO	main	$<$0.01	2D	0.931	1	1	0.61	355(152-558)	0.28	TSI	ARI	0.2	AMHARA	AFAR	1805(1660-1892)	0.15	IBS	WOLAYTA	312B(690B-36B)	0.28	TSI	ARI
OROMO	main.null	$<$0.01	2D	0.922	1	1	0.5	239(79-515)	0.27	TSI	ARI	0.21	AMHARA	AFAR	1834(1674-1892)	0.17	IBS	WOLAYTA	283B(617B-51B)	0.27	TSI	ARI
SEBANTU	main	$<$0.01	1D(2D)	0.986	1	1	0.55	1167(1051-1225)	0.29	KARRETJIE	MALAWI	0.28	AMAXHOSA	AMAXHOSA	1254(1196-1399)	0.27	KARRETJIE	MALAWI	2951B(3604B-848B)	0.31	KARRETJIE	MALAWI
SEBANTU	main.null	$<$0.01	1D(2D)	0.982	1	1	0.57	1109(1051-1196)	0.3	KARRETJIE	MALAWI	0.34	AMAXHOSA	AMAXHOSA	1254(1196-1641)	0.28	KARRETJIE	MALAWI	2777B(4025B-390)	0.31	KARRETJIE	MALAWI
SEMI-BANTU	main	$<$0.01	1D	0.43	0.999	1	0.03	674(192-1126)	0.2	MZIGUA	YORUBA	0.36	YORUBA	YORUBA	1167 NA	0.19	MZIGUA	YORUBA	7 NA	0.42	MALAWI	YORUBA
SEMI-BANTU	main.null	$<$0.01	1D	0.535	1	1	0.02	167B(965B-474)	0.27	MZIGUA	YORUBA	0.48	YORUBA	YORUBA	1080 NA	0.11	MZIGUA	YORUBA	1153B NA	0.27	MZIGUA	YORUBA
SEREHULE	main	$<$0.01	1D(2D)	0.943	1	1	0.36	1109(935-1225)	0.12	GBR	JOLA	0.46	MANJAGO	BAMBARA	1689(1515-1863)	0.25	FULAI	SERERE	413(514B-921)	0.11	GBR	JOLA
SEREHULE	main.null	$<$0.01	1D	0.94	1	1	0.35	1080(964-1225)	0.09	GBR	JOLA	0.41	JOLA	MALINKE	1544(1326-1834)	0.22	FULAI	JOLA	22B(1204B-822)	0.08	GBR	JOLA
SERERE	main	$<$0.01	1D(2D)	0.885	1	1	0.41	1080(761-1356)	0.14	GBR	JOLA	0.47	MANJAGO	FULAII	1602(1500-1791)	0.24	FULAI	JOLA	776B(1740B-254)	0.08	GBR	JOLA
SERERE	main.null	$<$0.01	1D(2D)	0.878	1	1	0.38	1051(761-1356)	0.14	GBR	JOLA	0.34	FULAII	MANJAGO	1602(1515-1805)	0.24	FULAI	JOLA	950B(1986B-211)	0.08	GBR	JOLA
SOMALI	main	$<$0.01	2D	0.933	1	1	0.6	268(36-529)	0.38	ANUAK	TIGRAY	0.12	WOLAYTA	WOLAYTA	1573(1370-1791)	0.18	MAASAI	WOLAYTA	921B(1458B-413B)	0.46	TIGRAY	GUMUZ
SOMALI	main.null	$<$0.01	2D	0.939	1	1	0.4	36(196B-268)	0.39	ANUAK	TIGRAY	0.07	WASAMBAA	WOLAYTA	1573(876-1805)	0.04	TSI	WOLAYTA	863B(1887B-399B)	0.47	TIGRAY	GUMUZ
SUDANESE	main	$<$0.01	1MW	0.789	0.782	0.999	0.21	1341(1225-1660)	0.27	GUMUZ	ANUAK	0.25	ANUAK	ANUAK	1660(1469-1892)	0.36	ANUAK	ANUAK	254B(979B-1284)	0.28	GUMUZ	ANUAK
SUDANESE	main.null	$<$0.01	1MW	0.658	0.856	0.999	0.13	1138(1196-1689)	0.31	GUMUZ	ANUAK	0.19	ANUAK	ANUAK	1892(1674-1892)	0.15	ANUAK	ANUAK	790(8B-1515)	0.23	GUMUZ	ANUAK
HERERO	main	$<$0.01	1D(2D)	0.851	0.998	1	0.46	1631(1747-1863)	0.41	SEMI-BANTU	NAMA	0.19	KAMBE	AMAXHOSA	1834(1834-1892)	0.26	NAMA	AMAXHOSA	558(298B-935)	0.43	NAMA	MALAWI
HERERO	main.null	$<$0.01	1D	0.816	0.998	1	0.34	1631(1718-1863)	0.41	SEMI-BANTU	NAMA	0.19	KAMBE	AMAXHOSA	1834(1805-1892)	0.24	NAMA	AMAXHOSA	674(124B-979)	0.44	NAMA	SEMI-BANTU
TIGRAY	main	$<$0.01	1D	0.956	1	1	0.26	152(51B-370)	0.32	TSI	ARI	0.31	AMHARA	AMHARA	1341(819-1776)	0.21	IBS	OROMO	602B(1968B-138B)	0.32	TSI	ARI
TIGRAY	main.null	$<$0.01	1D	0.947	1	1	0.2	36(196B-240)	0.35	TSI	ARI	0.42	AMHARA	AMHARA	1573(862-1892)	0.16	IBS	AFAR	399B(1562B-94B)	0.35	TSI	ARI
WABONDEI	main	$<$0.01	2D	0.985	0.998	0.999	0.48	1138(1080-1240)	0.11	TIGRAY	MZIGUA	0.5	MALAWI	WASAMBAA	1573(1326-1834)	0.28	WASAMBAA	MZIGUA	703(19-936)	0.1	TIGRAY	MZIGUA
WABONDEI	main.null	$<$0.01	2D	0.983	0.996	0.999	0.53	1109(1051-1196)	0.1	AFAR	MZIGUA	0.49	WASAMBAA	MALAWI	1573(1266-1820)	0.28	WASAMBAA	MZIGUA	587(52B-863)	0.1	AFAR	MZIGUA
WASAMBAA	main	$<$0.01	1D	0.988	1	1	0.34	1312(1254-1341)	0.14	TIGRAY	MZIGUA	0.3	LUHYA	MALAWI	1370(1341-1834)	0.12	TIGRAY	MZIGUA	631B(1226B-1138)	0.16	WOLAYTA	MZIGUA
WASAMBAA	main.null	$<$0.01	1D	0.988	1	1	0.34	1254(1225-1341)	0.15	AMHARA	MZIGUA	0.29	LUHYA	MALAWI	1486(1384-1863)	0.15	AMHARA	MZIGUA	210(283B-1066)	0.13	OROMO	MZIGUA
WOLAYTA	main	$<$0.01	1D	0.891	1	1	0.29	268(138B-602)	0.22	TSI	ARI	0.26	OROMO	SOMALI	1312(1138-1834)	0.14	TSI	SOMALI	1182B(1893B-144)	0.27	TSI	ARI
WOLAYTA	main.null	$<$0.01	1D	0.825	1	1	0.18	268(8B-602)	0.22	TSI	ARI	0.26	OROMO	SOMALI	1457(1137-1892)	0.15	TIGRAY	SOMALI	573B(1330B-388)	0.24	TSI	ARI
WOLLOF	main	$<$0.01	1D(2D)	0.938	1	1	0.63	1225(1138-1341)	0.13	GBR	JOLA	0.4	MALINKE	JOLA	1631(1544-1733)	0.19	FULAI	JOLA	254B(779B-355)	0.09	GBR	JOLA
WOLLOF	main.null	$<$0.01	1D(2D)	0.942	1	1	0.58	1167(1080-1283)	0.12	GBR	JOLA	0.36	FULAII	MANDINKAI	1573(1515-1762)	0.19	FULAI	JOLA	399B(951B-370)	0.08	GBR	JOLA
!XUN	main	$<$0.01	1D(2D)	0.957	0.999	1	0.39	1341(1254-1399)	0.27	SEMI-BANTU	JU/'HOANSI	0.08	SOMALI	/GUI//GANA	1602(1312-1892)	0.21	SEMI-BANTU	JU/'HOANSI	819(1008B-1196)	0.17	SEMI-BANTU	JU/'HOANSI
!XUN	main.null	$<$0.01	1D	0.951	0.999	1	0.21	1312(1254-1385)	0.28	SEMI-BANTU	JU/'HOANSI	0.07	SOMALI	/GUI//GANA	1805(1341-1892)	0.15	SEMI-BANTU	JU/'HOANSI	1080(329B-1167)	0.27	SEMI-BANTU	JU/'HOANSI
YORUBA	main	$<$0.01	1D	0.465	0.999	1	0.03	848(338-1184)	0.48	SEMI-BANTU	AKANS	0.29	AKANS	AKANS	1167(1036-1892)	0.49	AKANS	SEMI-BANTU	1501B(2896B-1182)	0.25	MOSSI	SEMI-BANTU
YORUBA	main.null	$<$0.01	1D	0.498	1	1	0.04	355(429B-761)	0.37	SEMI-BANTU	AKANS	0.26	AKANS	AKANS	1109(905-1892)	0.5	SEMI-BANTU	AKANS	2342B(4107B-778)	0.16	BANTU	AKANS
